# Supplementary material for: Iodine/Oxone® oxidative system for the synthesis of selenylindoles bearing a benzenesulfonamide moiety as carbonic anhydrase I, II, IX, and XII inhibitors
Source: Royal Society of Chemistry journal article supplement (doi:10.1039/d4ob00826j), 2024-01-01
Supplement: d4ob00826j1.pdf [file d4ob00826j1.pdf]

## Supporting Information for

### **Iodine/Oxone<sup>®</sup> oxidative system for the Synthesis of Selenylindoles Bearing Benzenesulfonamide Moiety as Carbonic Anhydrase I, II, IX, and XII Inhibitors**

Martina Palomba,<sup>†a</sup> Andrea Angeli,<sup>†b</sup> Riccardo Galdini,<sup>a</sup> Alexandra Joana Hughineata,<sup>a</sup> Gelson Perin,<sup>c</sup> Eder João Lenardão,<sup>c</sup> Francesca Marini,<sup>a</sup> Claudio Santi,<sup>\*a</sup> Claudiu T. Supuran,<sup>b</sup> Luana Bagnoli<sup>\*a</sup>

<sup>a</sup>Department of Pharmaceutical Sciences (Group of Catalysis, Synthesis and Organic Green Chemistry), University of Perugia, Via del Liceo 1, 06123 Perugia, Italy.

<sup>b</sup>University of Florence, NEUROFARBA Dept., Sezione di Scienze Farmaceutiche, Via Ugo Schiff 6, 50019 Sesto Fiorentino, Florence, Italy.

<sup>c</sup>Laboratório de Síntese Orgânica Limpa (LASOL), Centro de Ciências Químicas, Farmacêuticas e de Alimentos (CCQFA) Universidade Federal de Pelotas (UFPel), P.O. Box 354, CEP: 96010-900 Pelotas, RS, Brazil.

<sup>†</sup> These authors contributed equally to this work

e-mail: luana.bagnoli@unipg.it

#### **Table of Contents**

|                                                                                                     |     |
|-----------------------------------------------------------------------------------------------------|-----|
| 1. General information and materials                                                                | S2  |
| 2. General Procedure                                                                                | S2  |
| 3. <sup>1</sup> H, <sup>13</sup> C, <sup>77</sup> Se NMR spectra of compounds <b>3</b> and <b>4</b> | S3  |
| 4. HMRS Spectra of new compounds                                                                    | S26 |
| 5. Carbonic anhydrase inhibition                                                                    | S34 |
| 6. Human Carbonic Anhydrase activity                                                                | S34 |
| 7. References                                                                                       | S35 |

## 1. General Information and materials

Reagents and solvents were purchased from Sigma Aldrich, Alfa Aesar and VWR International and employed without further purification, except for the starting products indole carboxamides **1f-1g** and diselenides **2b-g,i** that are prepared according to the literature procedures.<sup>1-7</sup> Thin layer chromatography (TLC) was performed in 60 F254 (Merck, KGaA, Darmstadt, Germany) silica gel supported on aluminium sheets. Reaction products were purified by column chromatography on Merck 60 (70-230 mesh) silica gel. Yields correspond to isolated compounds. Purity is estimated to be  $\geq 95\%$  based on  $^1\text{H}$  NMR spectroscopic analysis. NMR experiments were carried out at 25 °C on a Bruker Avance NEO 400 MHz spectrometer equipped with Sample Case operating at 400 MHz for  $^1\text{H}$  and 100.62 MHz for  $^{13}\text{C}$  or a Bruker Avance NEO 600 MHz spectrometer equipped with a Prodigy<sup>TM</sup>BBO-Cryoprobe operating at 600.13 MHz for  $^1\text{H}$ , 150.90 MHz for  $^{13}\text{C}$  in  $\text{CDCl}_3$ ,  $\text{CD}_3\text{OD}$ ,  $\text{DMSO}-d_6$  and  $\text{CD}_3\text{COCD}_3$ .  $^{77}\text{Se}$  NMR spectra are referenced to diphenyl diselenide external standard  $(\text{PhSe})_2$  and were recorded at 114 MHz.<sup>8</sup> Chemical shifts ( $\delta$ ) are reported in ppm. The  $^1\text{H}$  NMR spectra registered in  $\text{CD}_3\text{OD}$  did not show signals for the exchangeable protons of indole NH,  $\text{SO}_2\text{NH}_2$ , such protons are visible in  $\text{DMSO}-d_6$ . High-resolution mass spectrometry (HRMS) measurements were performed using Synapt G2-Si mass spectrometer (Waters) equipped with an APCI/ ESI source and quadrupole-Time-of-Flight mass analyzer. The mass spectrometer operated in the positive ion detection mode. To ensure accurate mass measurements, data were collected in centroid mode and mass was corrected during acquisition using leucine enkephalin solution as an external reference. The results of the measurements were processed using the MassLynx 4.1 software (Waters) incorporated with the instrument. Melting points were determined in Kofler melting apparatus and value are uncorrected.

## 2. General Procedure

The indole **1a-k, m-q** (1.0 eq., 0.5 mmol) or the pyrazole **1l** (1.0 eq. 0.5 mmol), the diselenide **2a-g, 2i** (0.5 eq., 0.25 mmol) or disulfide **2h** (0.5 eq., 0.25 mmol), Oxone<sup>®</sup> triple salt (0.5 eq., 0.25 mmol) and the iodine (20 mol%) were dissolved in 5 mL of  $\text{CH}_3\text{CN}$ . The reaction mixture was vigorously stirred at room temperature for 4 to 24 hours. Then, the reaction was quenched with a saturated solution of  $\text{Na}_2\text{S}_2\text{O}_3$  and extracted with ethyl acetate (3 x 10 mL), dried with  $\text{Na}_2\text{SO}_4$ , filtered, and evaporated under reduced pressure. The crude mixture was purified by column chromatography on silica gel to afford the 3-selenylindoles **3a-q**, 4-selenylpyrazoles **3r-s**, mono- and bis- sulfenylindoles **3t-3t'**, and 3-selenylindoles containing benzensulfonamide moiety **4a-l**.

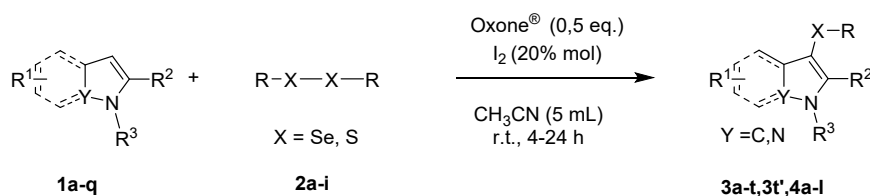

3.  $^1\text{H}$  NMR,  $^{13}\text{C}$  and  $^{77}\text{Se}$  NMR spectra of compounds 3 and 4

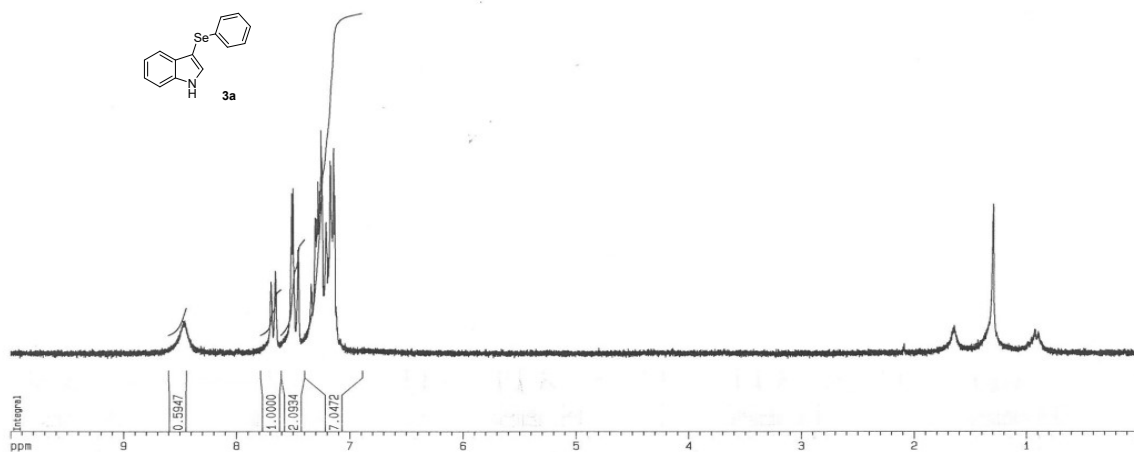

**Figure 1.**  $^1\text{H}$  NMR spectrum of compound **3a**<sup>9</sup> in  $\text{CDCl}_3$

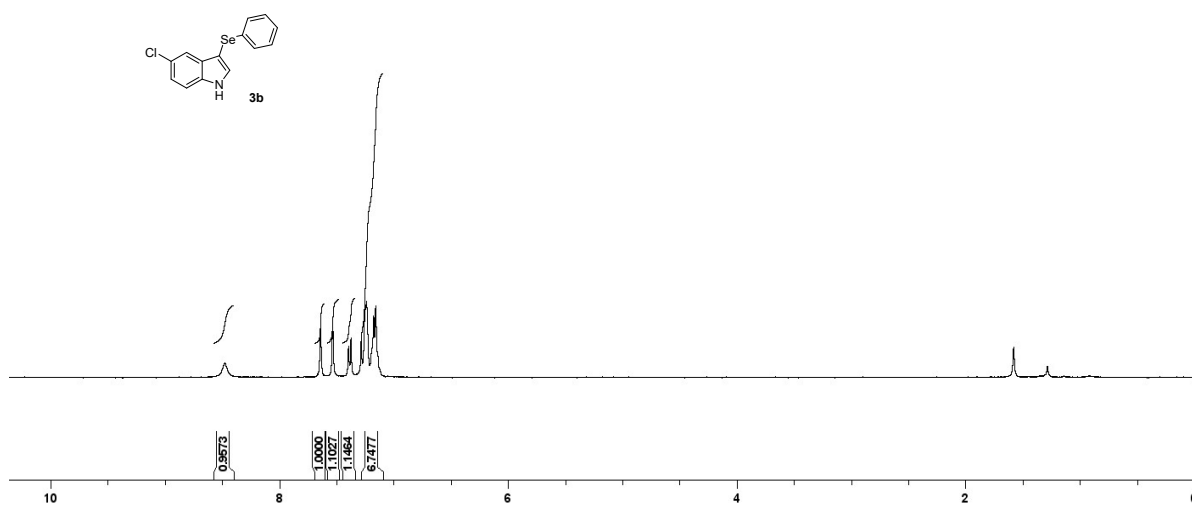

**Figure 2.**  $^1\text{H}$  NMR spectrum of compound **3b**<sup>9</sup> in  $\text{CDCl}_3$

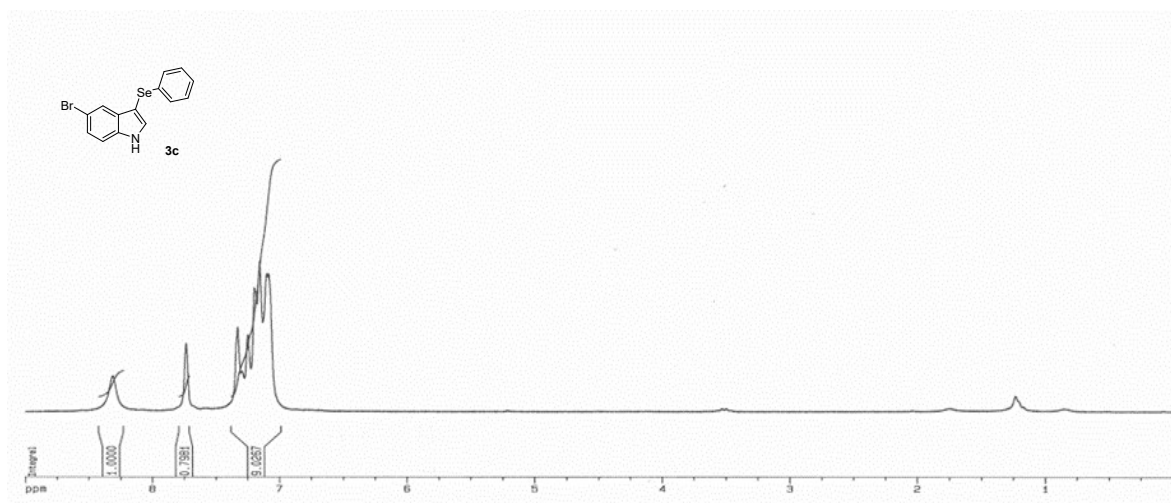

**Figure 3.** <sup>1</sup>H NMR spectrum of compound **3c**<sup>9</sup> in CDCl<sub>3</sub>

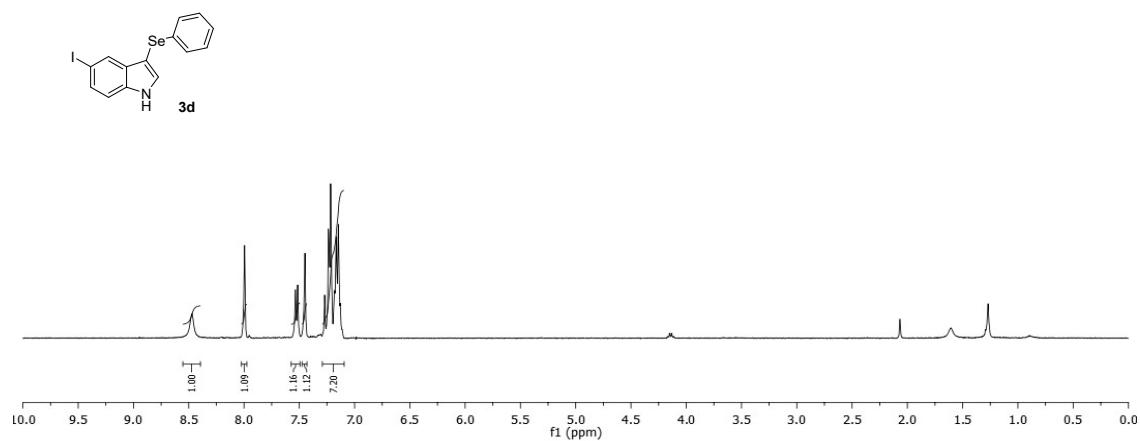

**Figure 4.** <sup>1</sup>H NMR spectrum of compound **3d**<sup>9</sup> in CDCl<sub>3</sub>

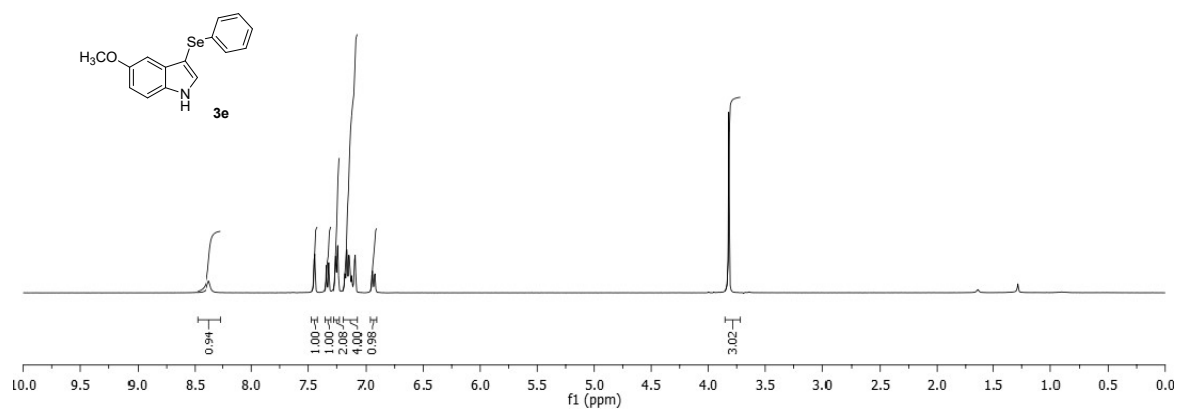

**Figure 5.** <sup>1</sup>H NMR spectrum of compound **3e**<sup>9</sup> in CDCl<sub>3</sub>

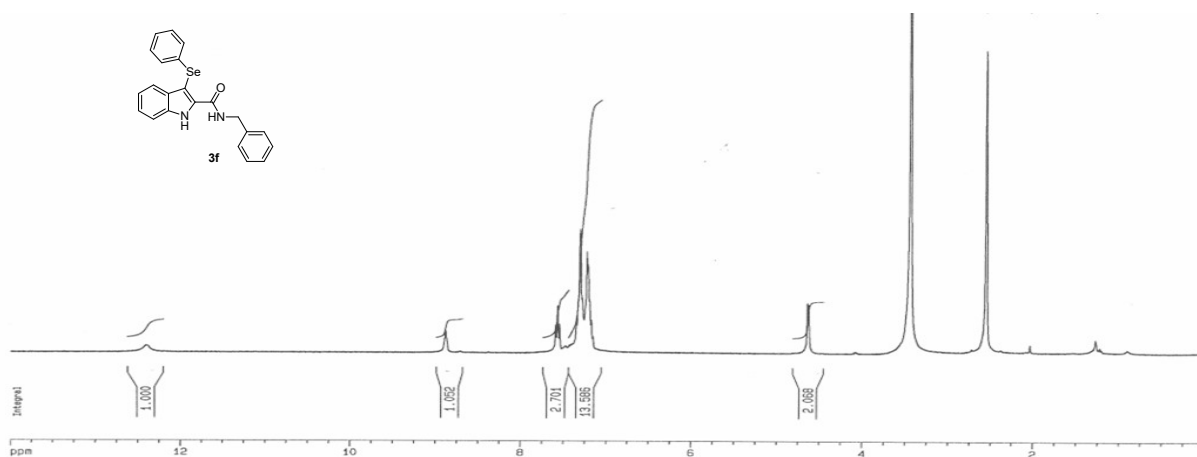

**Figure 6.** <sup>1</sup>H NMR spectrum of compound **3f** in DMSO-d<sub>6</sub>

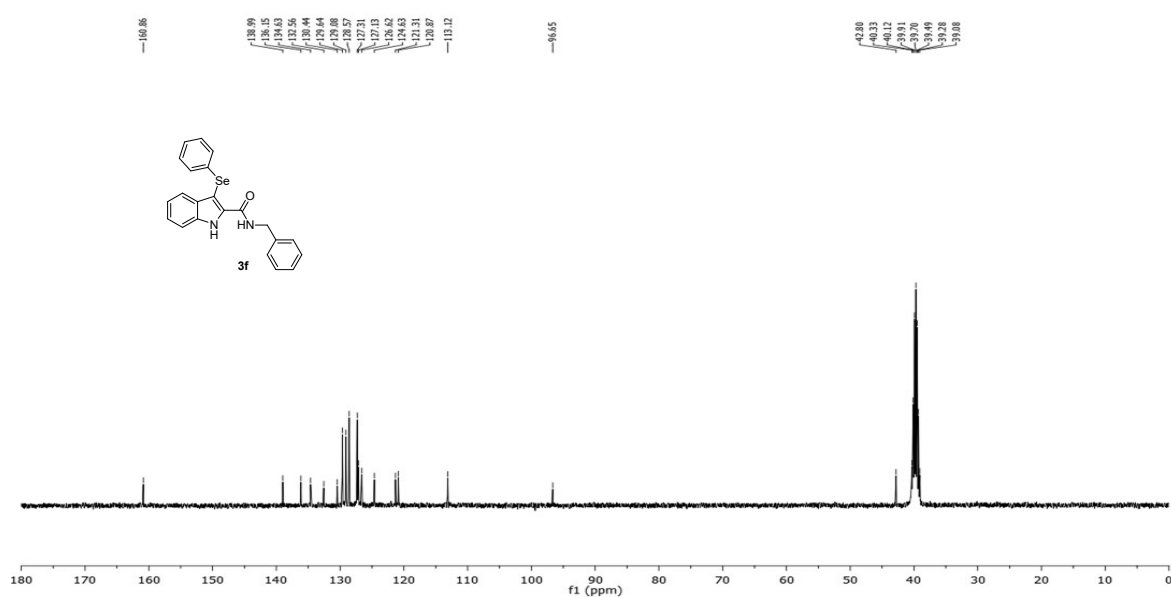

**Figure 7.** <sup>13</sup>C NMR spectrum of compound **3f** in DMSO-d<sub>6</sub>

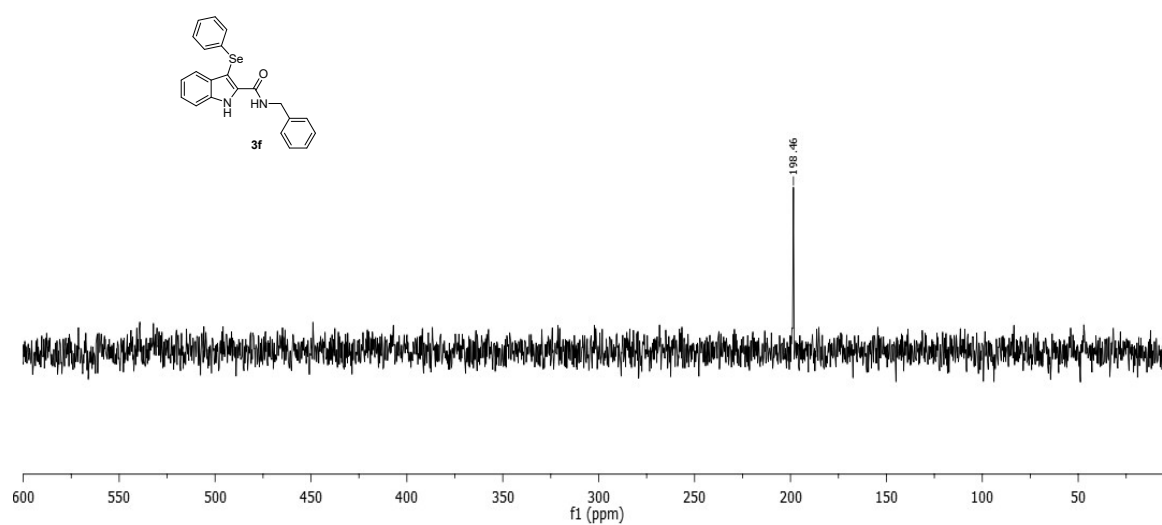

**Figure 8.** <sup>77</sup>Se NMR spectrum of compound **3f** in DMSO-d<sub>6</sub>

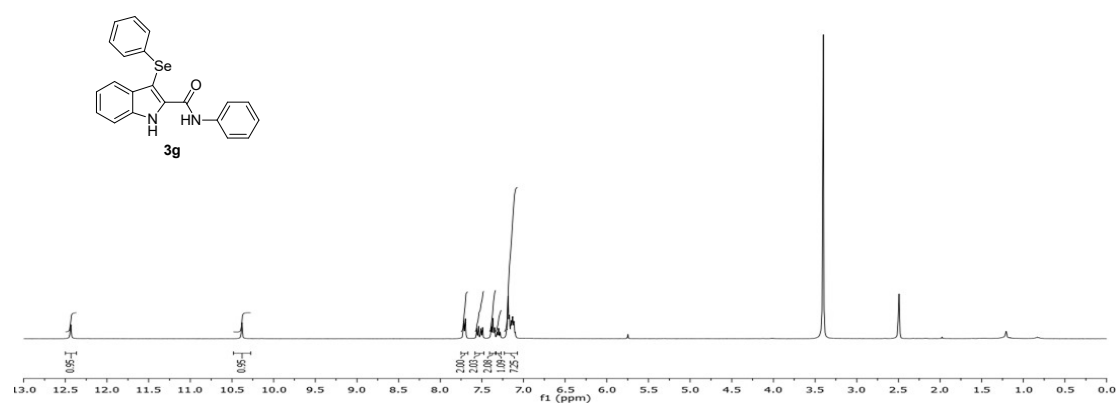

**Figure 9.** <sup>1</sup>H NMR spectrum of compound **3g** in DMSO-d<sub>6</sub>

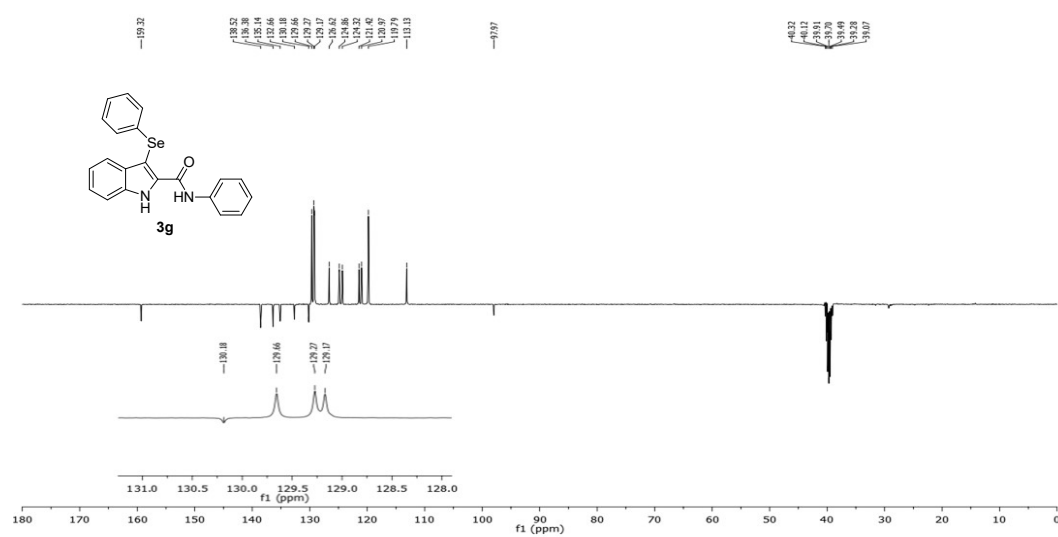

**Figure 10.** <sup>13</sup>C NMR spectrum of compound **3g** in DMSO-d<sub>6</sub>

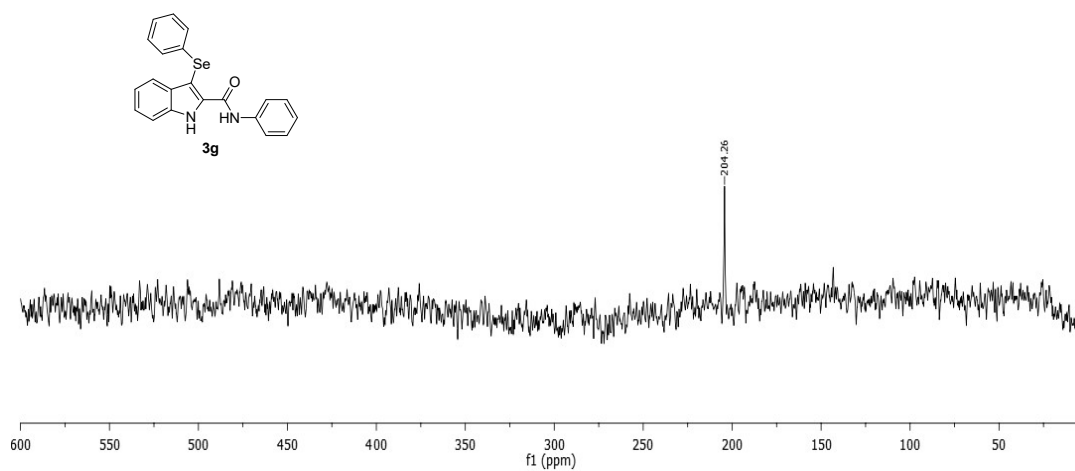

**Figure 11.** <sup>77</sup>Se NMR spectrum of compound **3g** in DMSO-d<sub>6</sub>

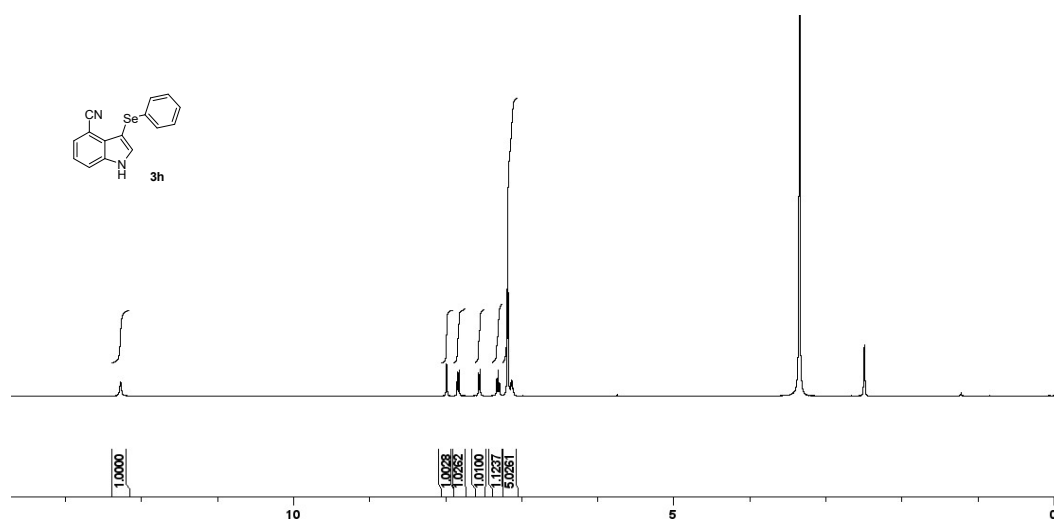

**Figure 12.**  $^1\text{H}$  NMR spectrum of compound **3h**<sup>9</sup> in  $\text{DMSO-d}_6$

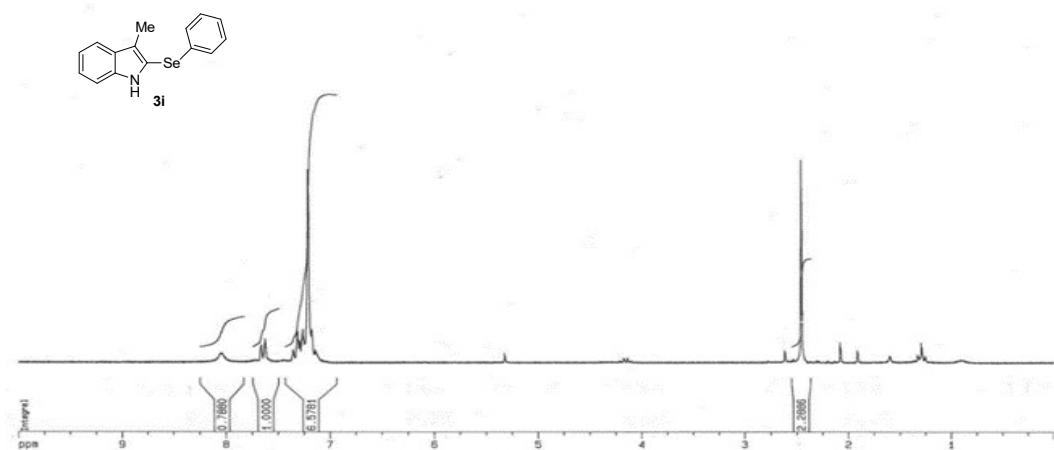

**Figure 13.**  $^1\text{H}$  NMR spectrum of compound **3i**<sup>10</sup> in  $\text{CDCl}_3$

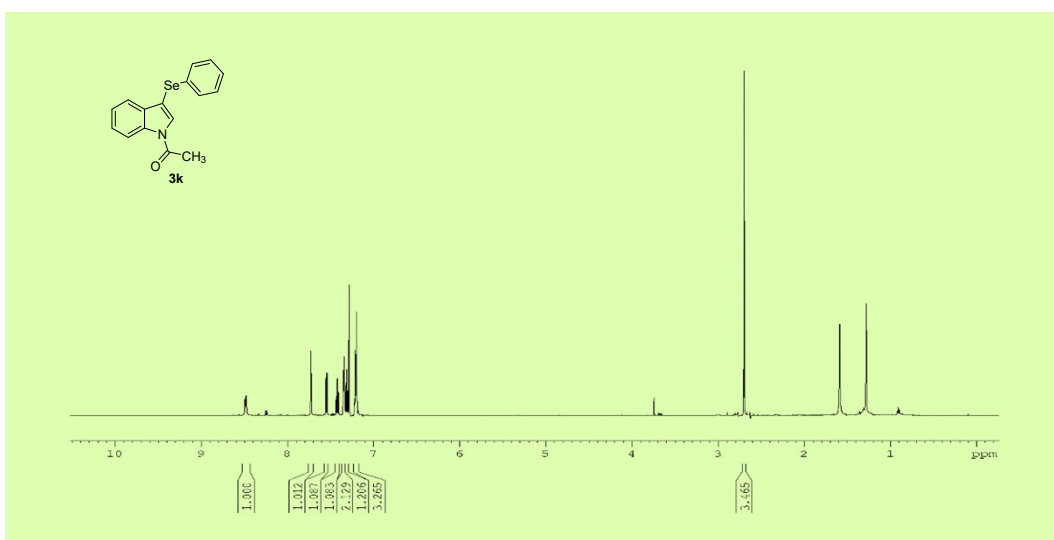

**Figure 14.**  $^1\text{H}$  NMR spectrum of compound **3k** in  $\text{CDCl}_3$

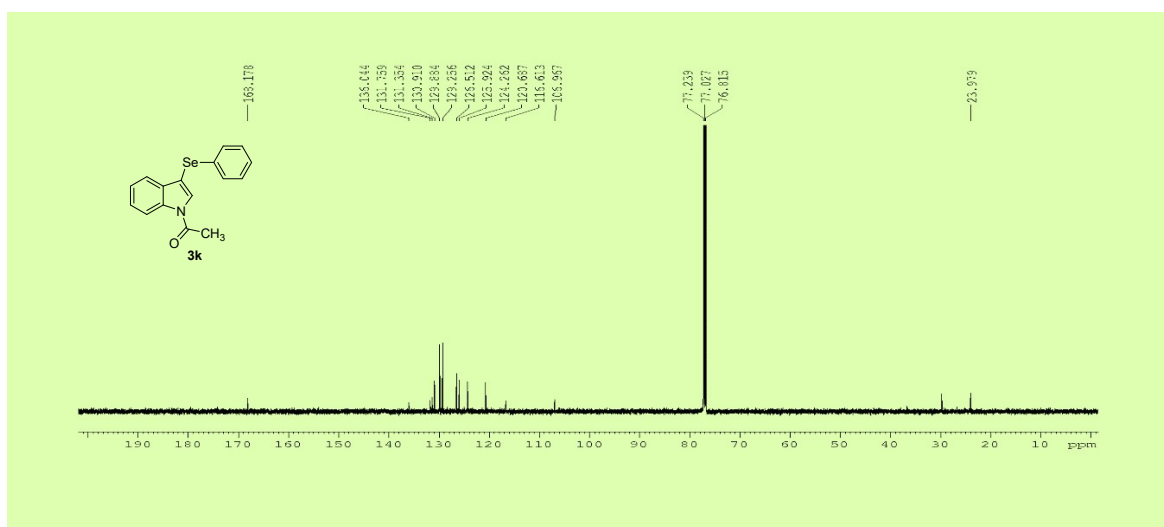

**Figure 15.**  $^{13}\text{C}$  NMR spectrum of compound **3k** in  $\text{CDCl}_3$

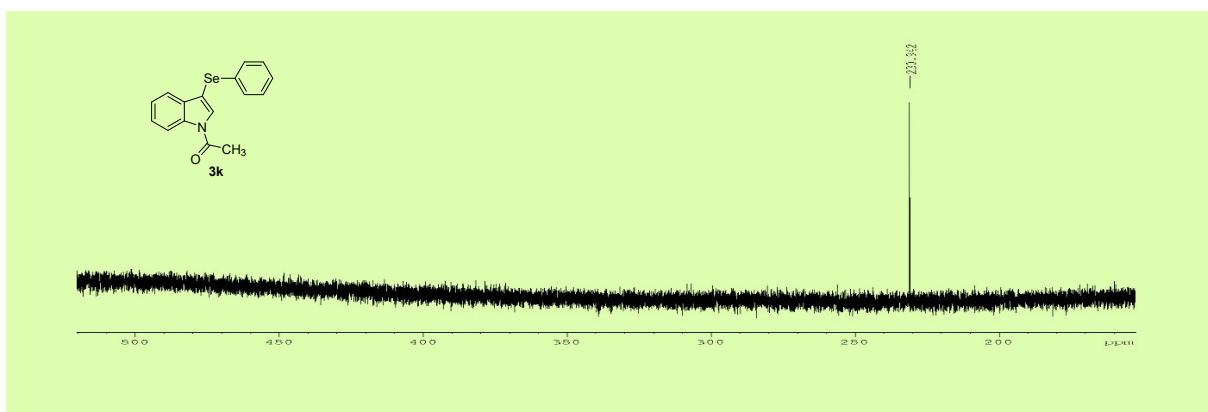

**Figure 16.**  $^{77}\text{Se}$  NMR spectrum of compound **3k** in  $\text{CDCl}_3$

**Fig**

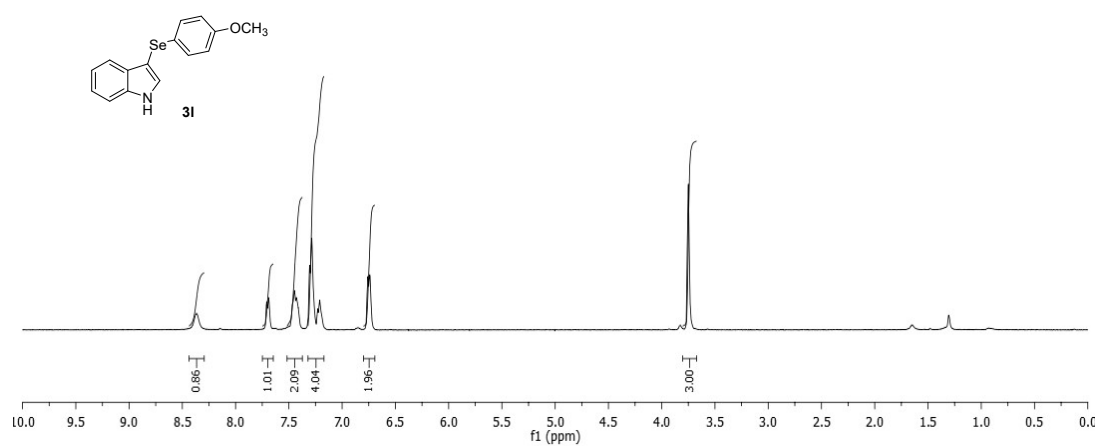

**Figure 17.**  $^1\text{H}$  NMR spectrum of compound **3l** in  $\text{CDCl}_3$



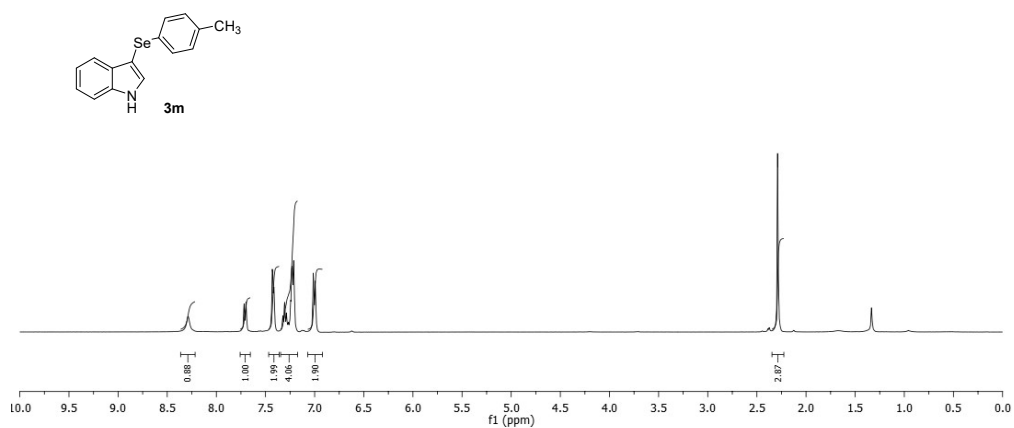

**Figure 18.** <sup>1</sup>H NMR spectrum of compound **3m**<sup>9</sup> in CDCl<sub>3</sub>

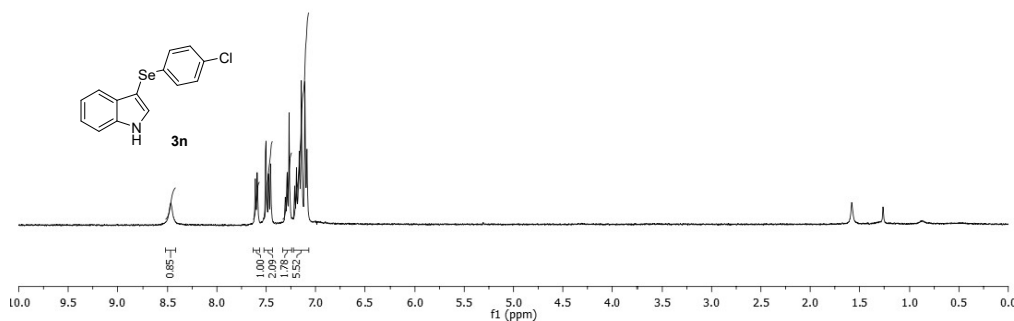

**Figure 19.** <sup>1</sup>H NMR spectrum of compound **3n**<sup>9</sup> in CDCl<sub>3</sub>

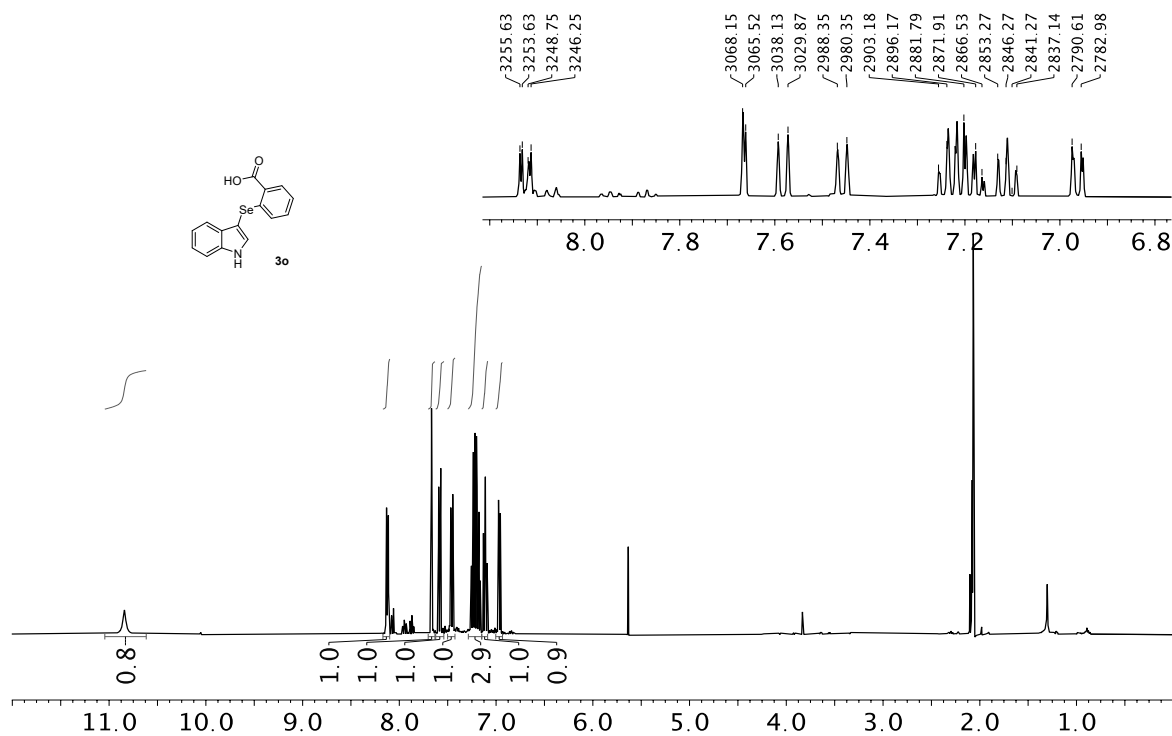

**Figure 20.** <sup>1</sup>H NMR spectrum of compound **3o**<sup>9</sup> in CD<sub>3</sub>COCD<sub>3</sub>

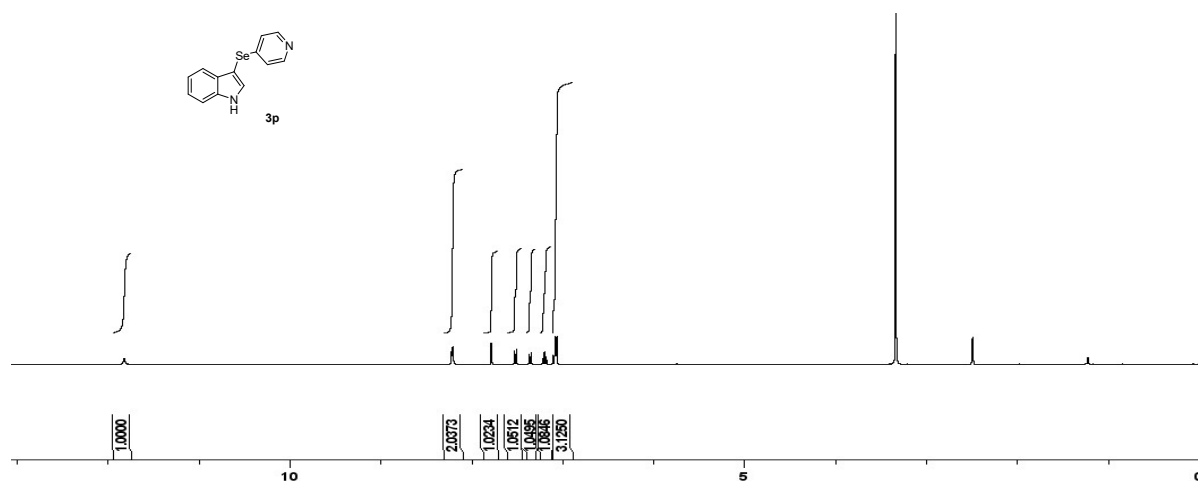

**Figure 21.** <sup>1</sup>H NMR spectrum of compound **3p**<sup>11</sup> in DMSO-d<sub>6</sub>

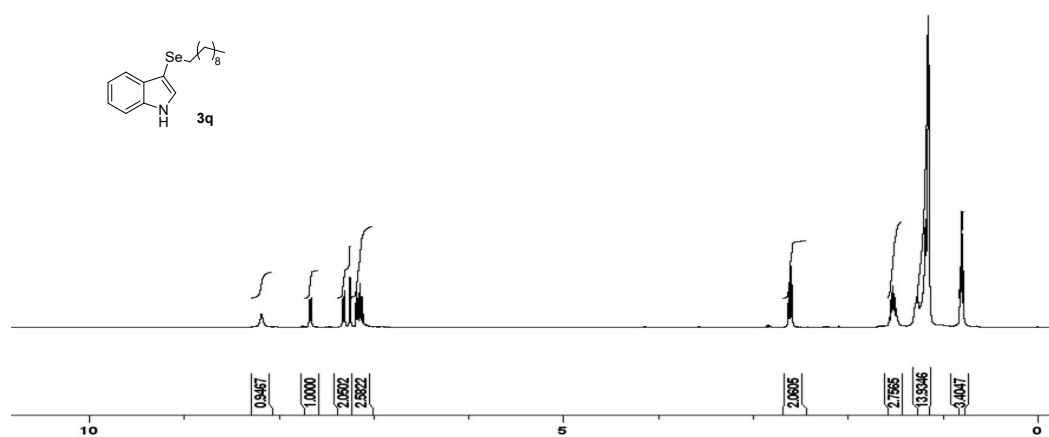

**Figure 22.** <sup>1</sup>H NMR spectrum of compound **3q** in CDCl<sub>3</sub>

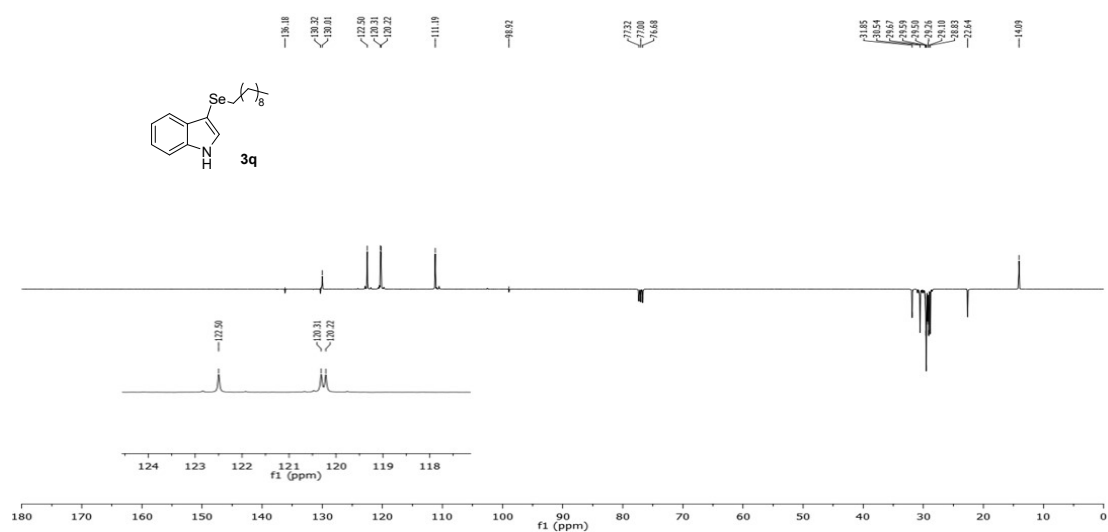

**Figure 23.** <sup>13</sup>C NMR spectrum of compound **3q** in CDCl<sub>3</sub>

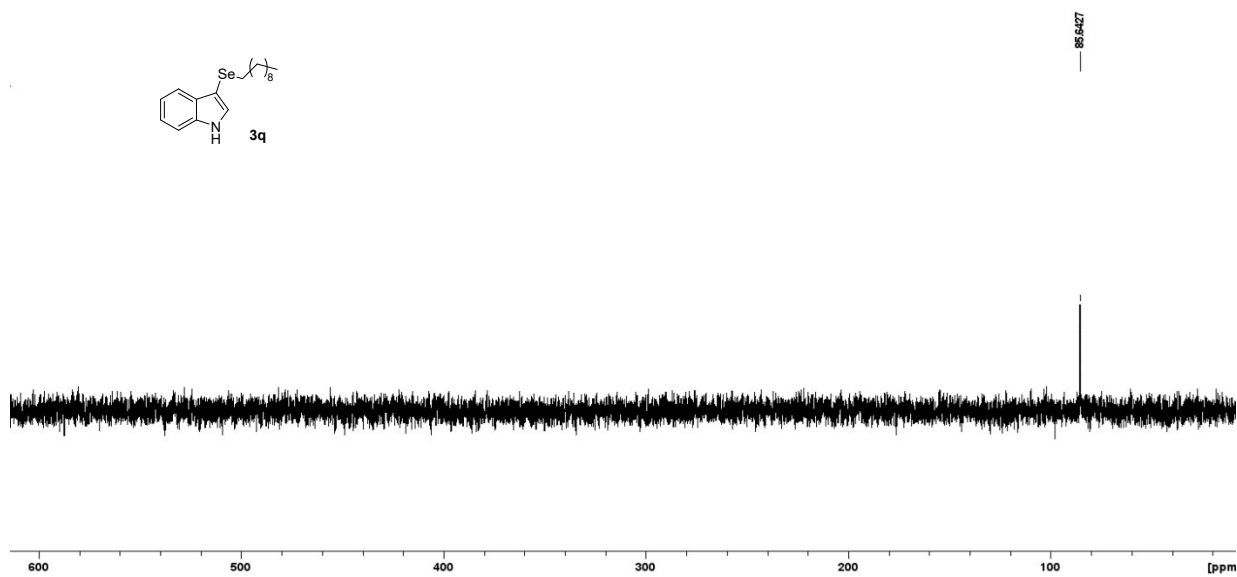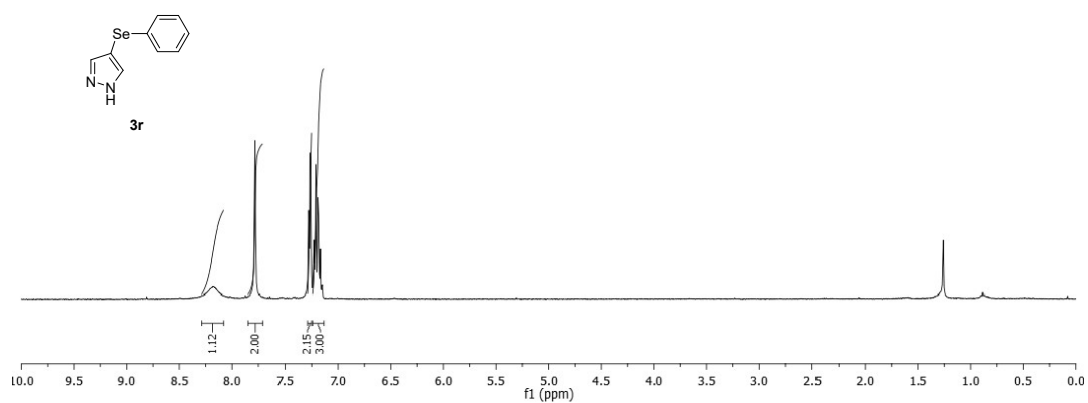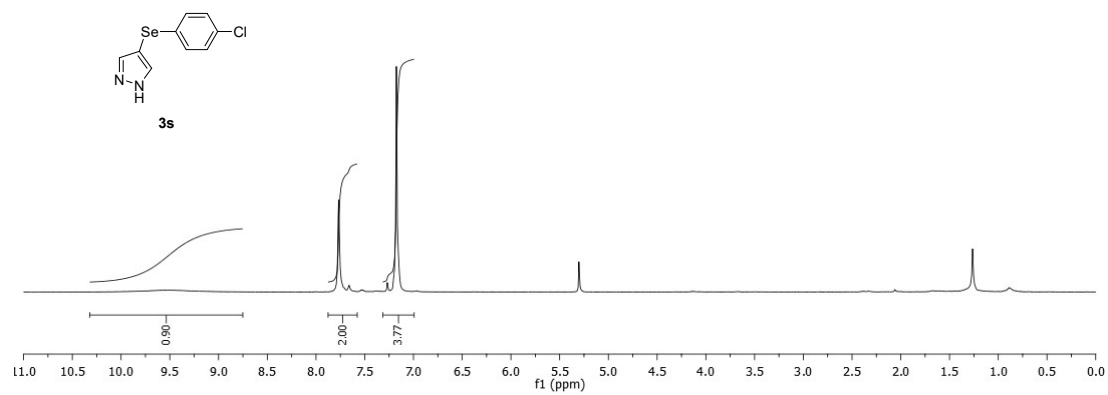

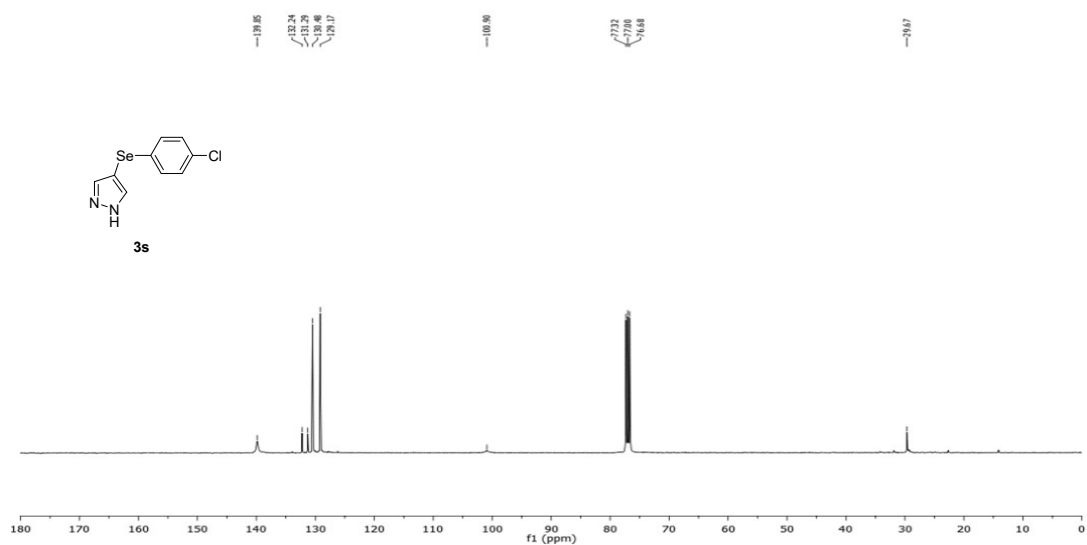

**Figure 27.** <sup>13</sup>C NMR spectrum of compound **3s** in CDCl<sub>3</sub>

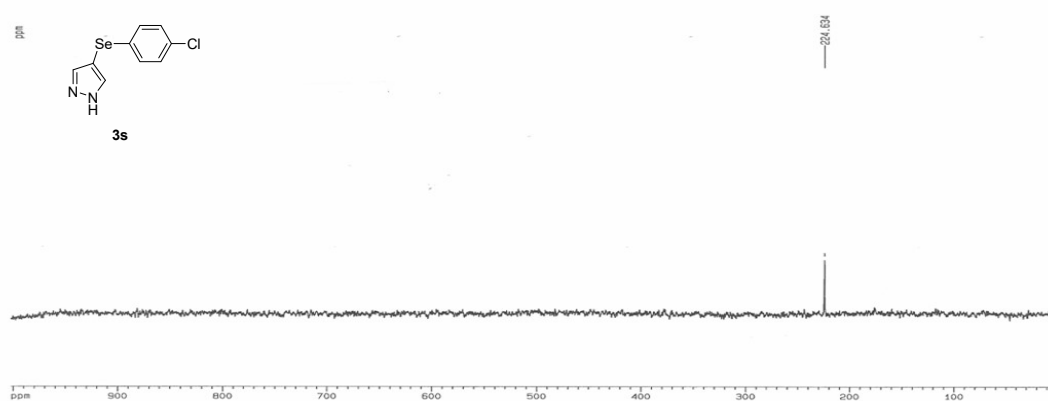

**Figure 28.** <sup>77</sup>Se NMR spectrum of compound **3s** in CDCl<sub>3</sub>

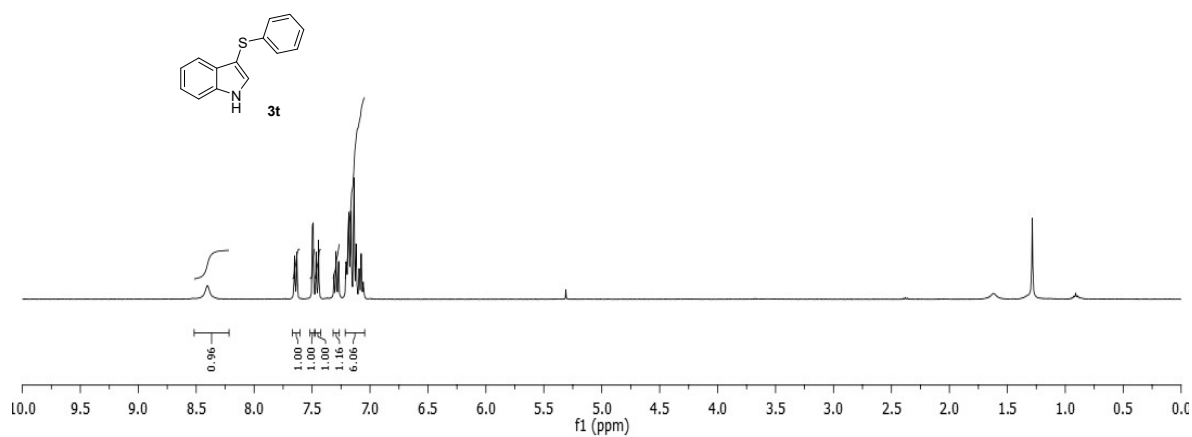

**Figure 29.** <sup>1</sup>H NMR spectrum of compound **3t**<sup>13</sup> in CDCl<sub>3</sub>

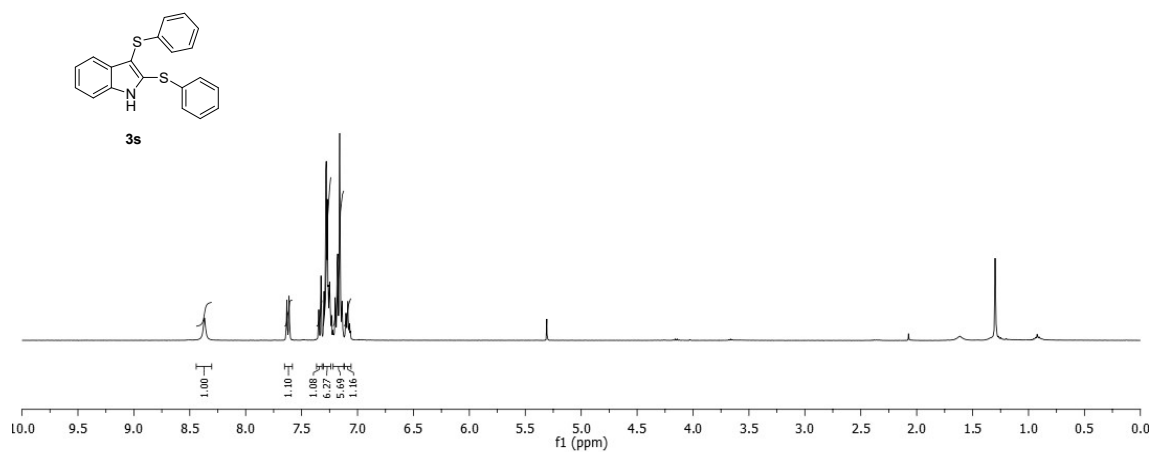

**Figure 30.** <sup>1</sup>H NMR spectrum of compound **3t'**<sup>14</sup> in CDCl<sub>3</sub>

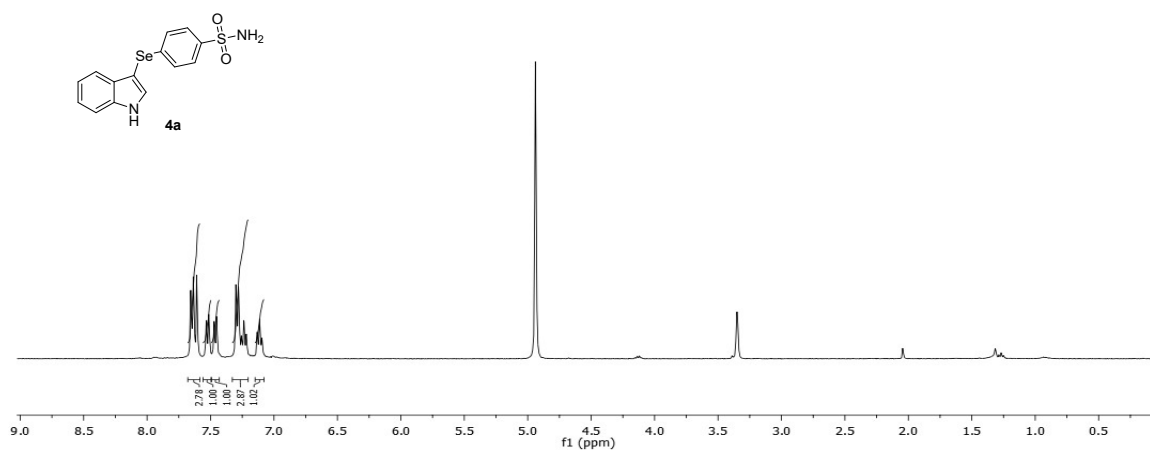

**Figure 31.** <sup>1</sup>H NMR spectrum of compound **4a** in CD<sub>3</sub>OD

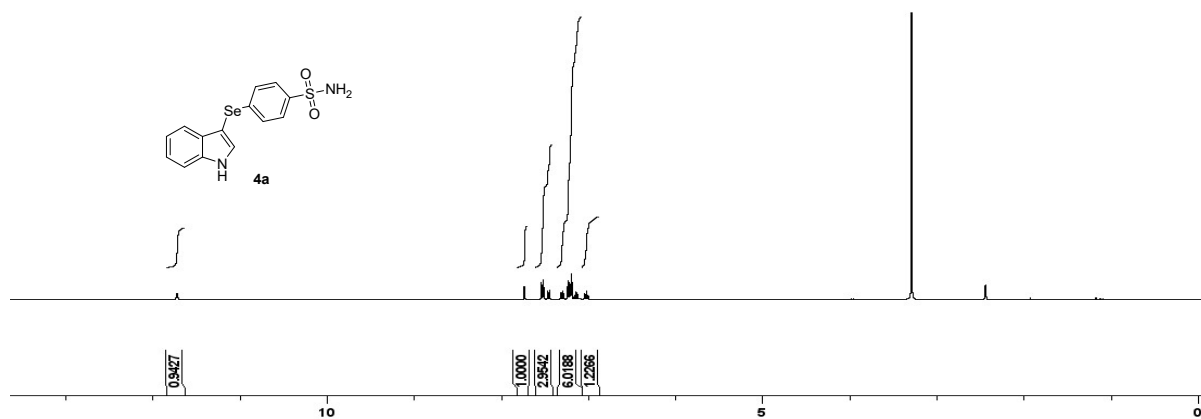

**Figure 32.** <sup>1</sup>H NMR spectrum of compound **4a** in DMSO-d<sub>6</sub>

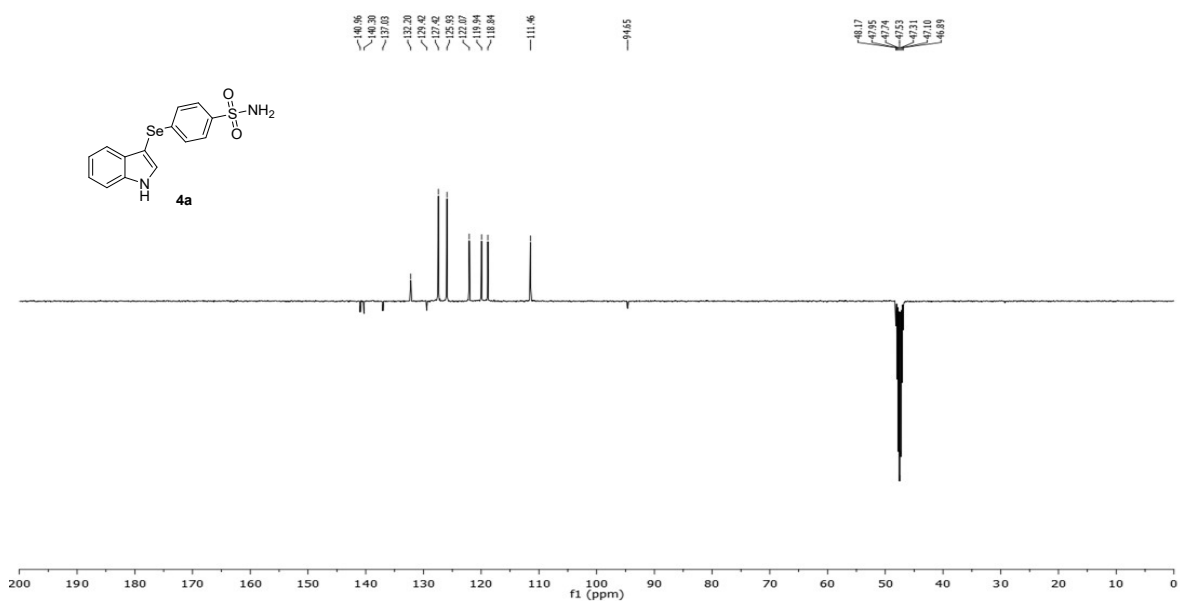

**Figure 33.** <sup>13</sup>C NMR spectrum of compound **4a** in CD<sub>3</sub>OD

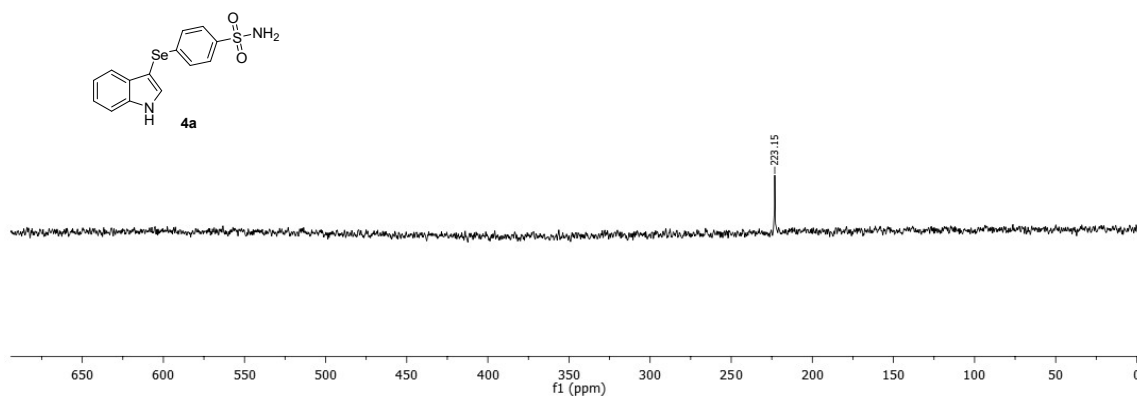

**Figure 34.** <sup>77</sup>Se NMR spectrum of compound **4a** in CD<sub>3</sub>OD

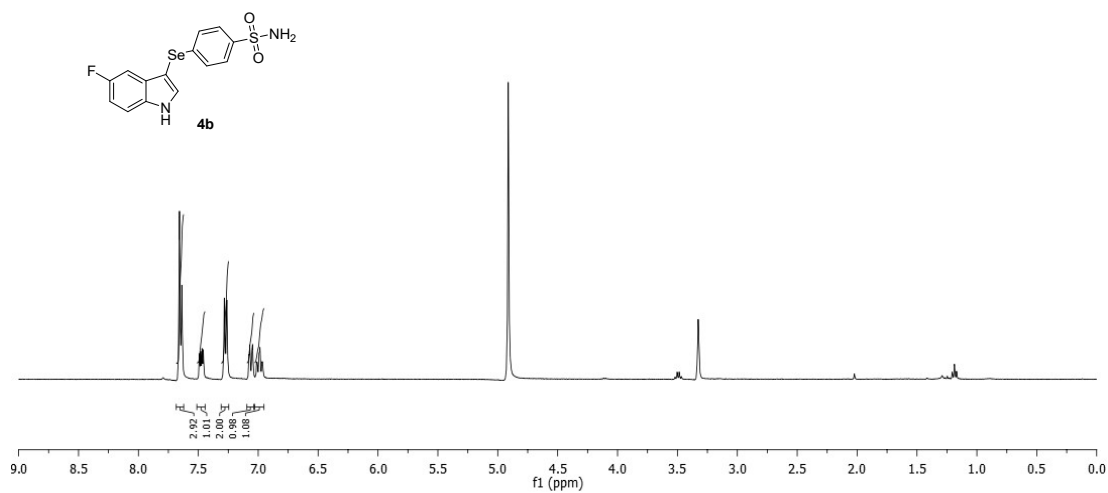

**Figure 35.** <sup>1</sup>H NMR spectrum of compound **4b** in CD<sub>3</sub>OD

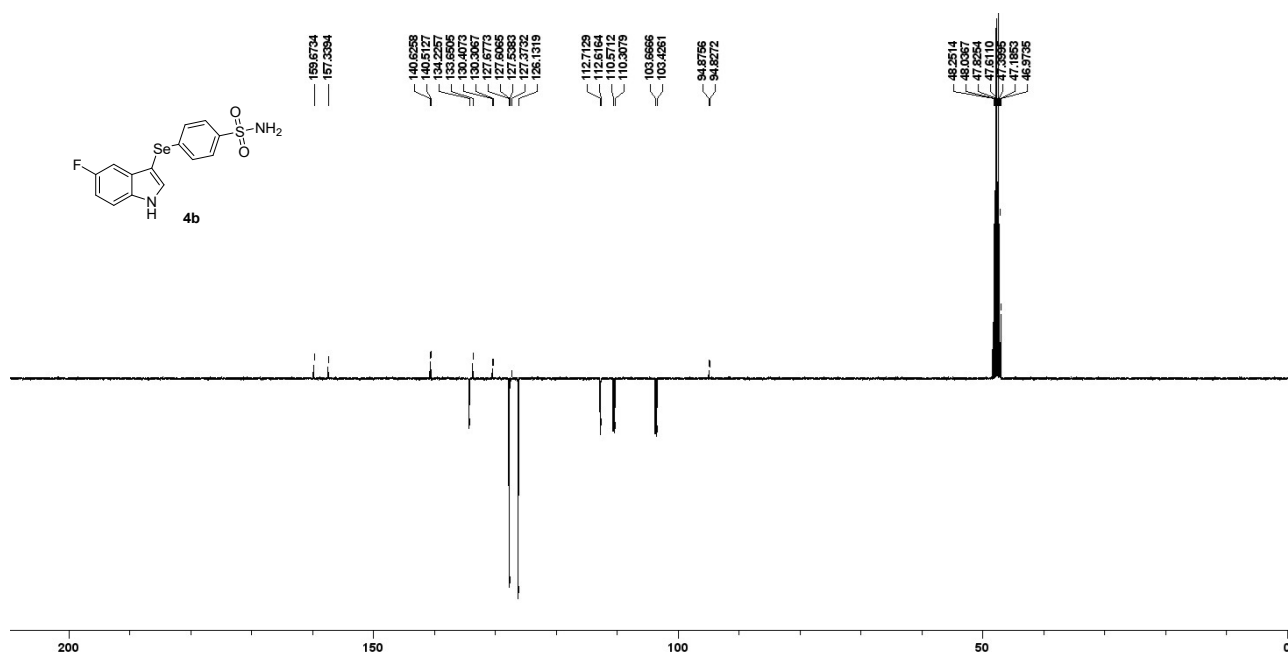

**Figure 36.** <sup>13</sup>C NMR spectrum of compound **4b** in CD<sub>3</sub>OD

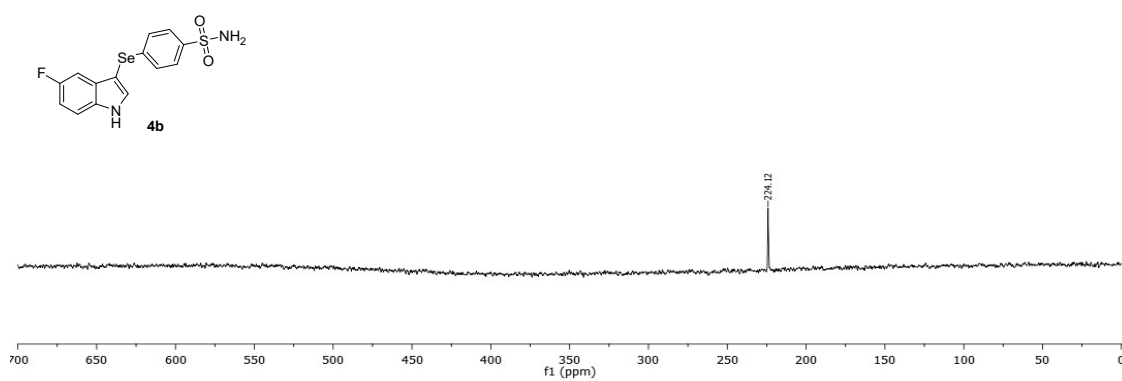

**Figure 37.** <sup>77</sup>Se NMR spectrum of compound **4b** in CD<sub>3</sub>OD

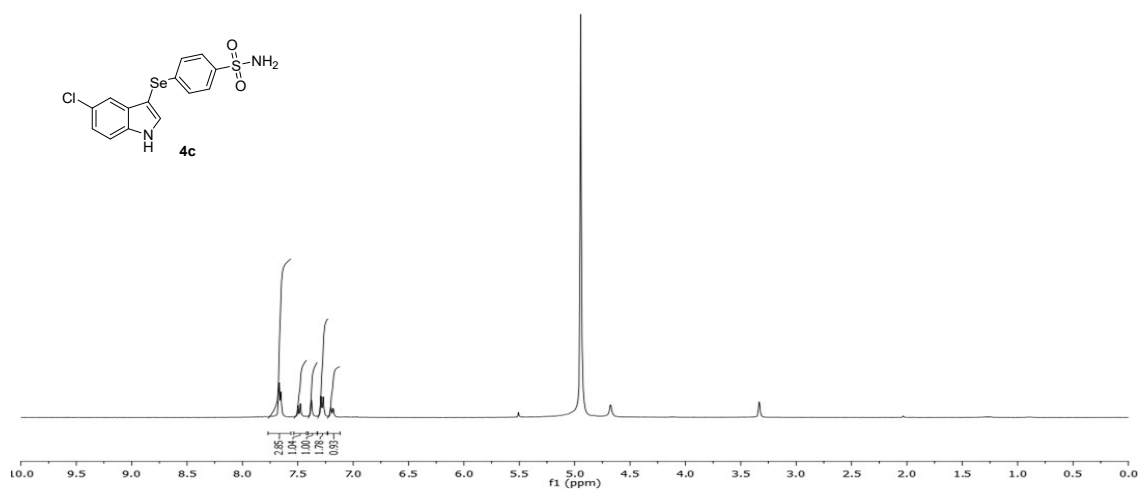

**Figure 38.** <sup>1</sup>H NMR spectrum of compound **4c** in CD<sub>3</sub>OD

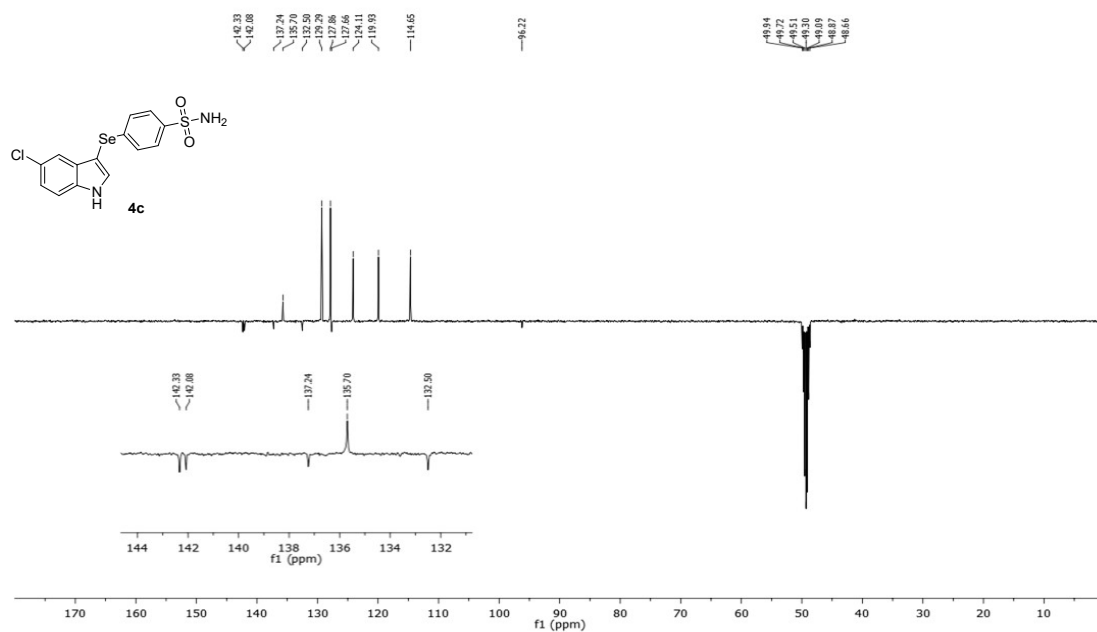

**Figure 39.** <sup>13</sup>C NMR spectrum of compound **4c** in CD<sub>3</sub>OD

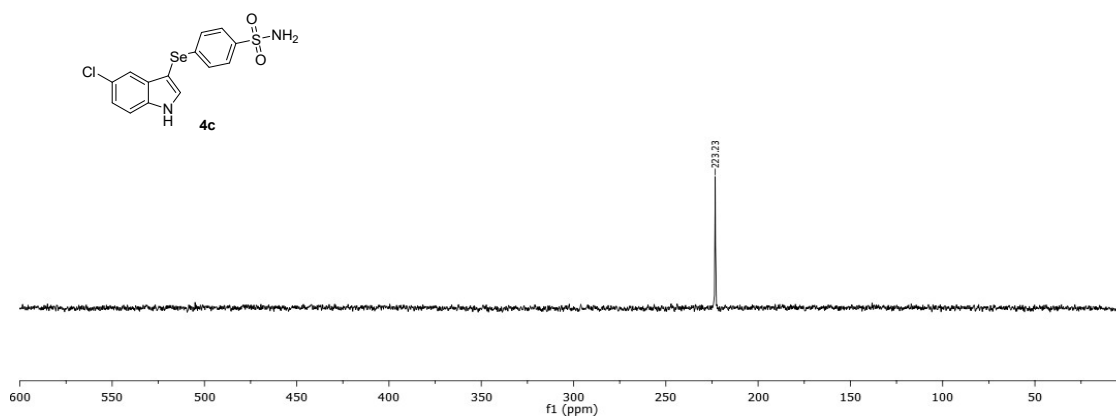

**Figure 40.** <sup>77</sup>Se NMR spectrum of compound **4c** in CD<sub>3</sub>OD

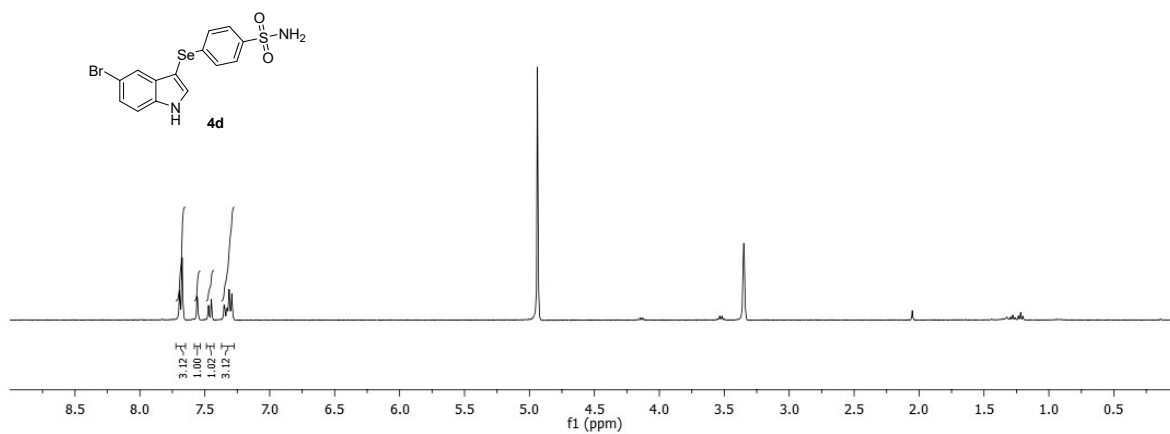

**Figure 41.** <sup>1</sup>H NMR spectrum of compound **4d** in CD<sub>3</sub>OD



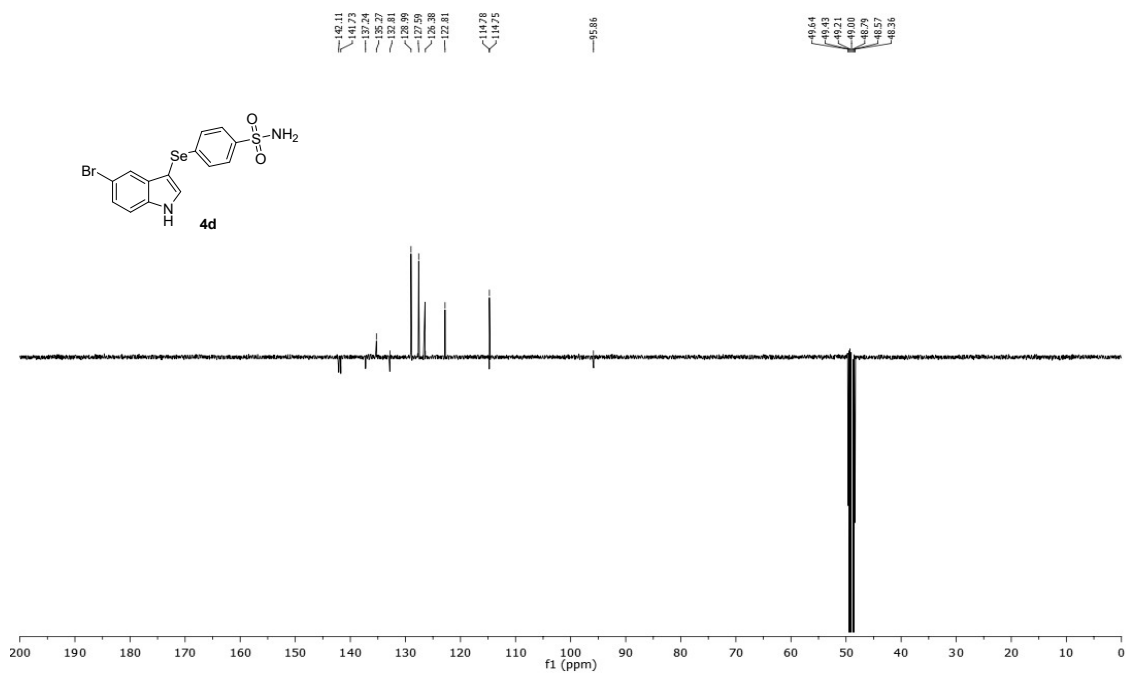

**Figure 42.** <sup>13</sup>C NMR spectrum of compound **4d** in CD<sub>3</sub>OD

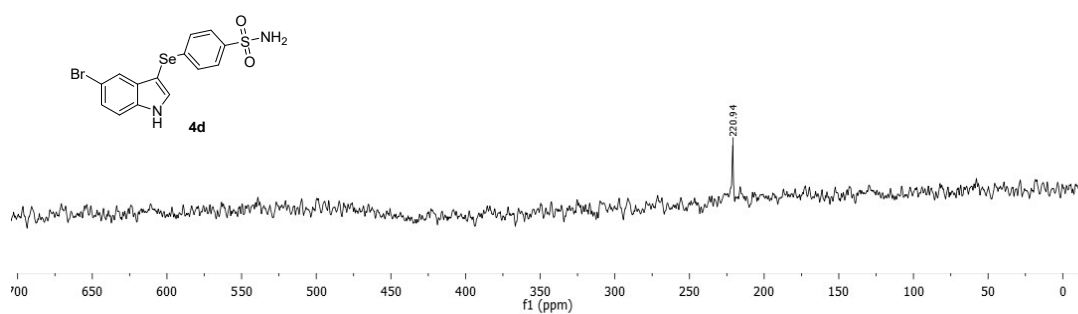

**Figure 43.** <sup>77</sup>Se NMR spectrum of compound **4d** in CD<sub>3</sub>OD

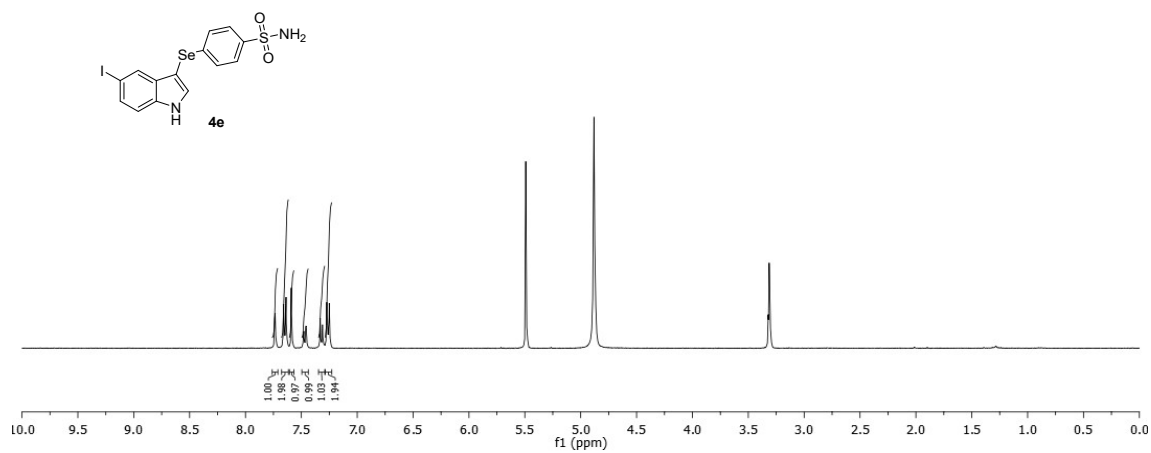

**Figure 44.** <sup>1</sup>H NMR spectrum of compound **4e** in CD<sub>3</sub>OD

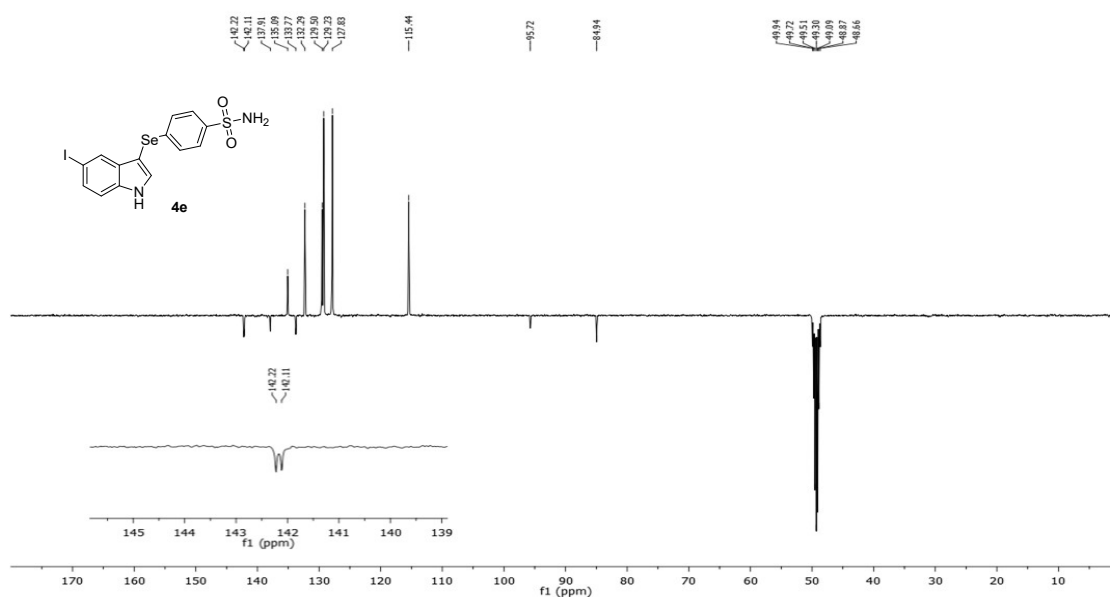

**Figure 45.**  $^{13}\text{C}$  NMR spectrum of compound **4e** in  $\text{CD}_3\text{OD}$

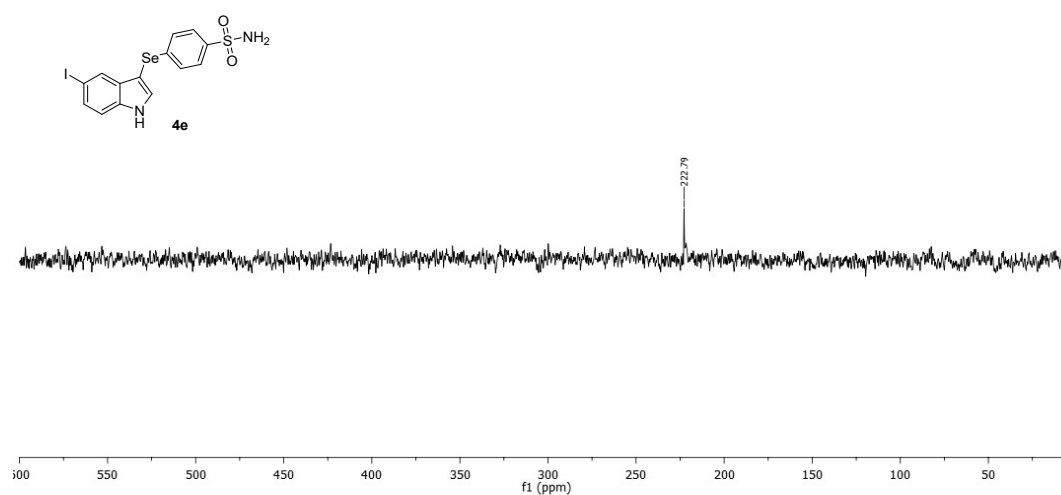

**Figure 46.**  $^{77}\text{Se}$  NMR spectrum of compound **4e** in  $\text{CD}_3\text{OD}$

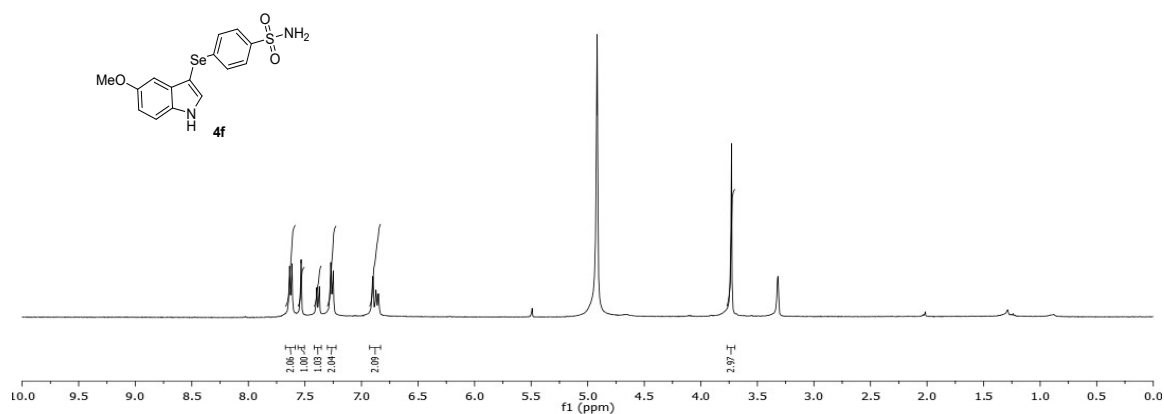

**Figure 47.**  $^1\text{H}$  NMR spectrum of compound **4f** in  $\text{CD}_3\text{OD}$

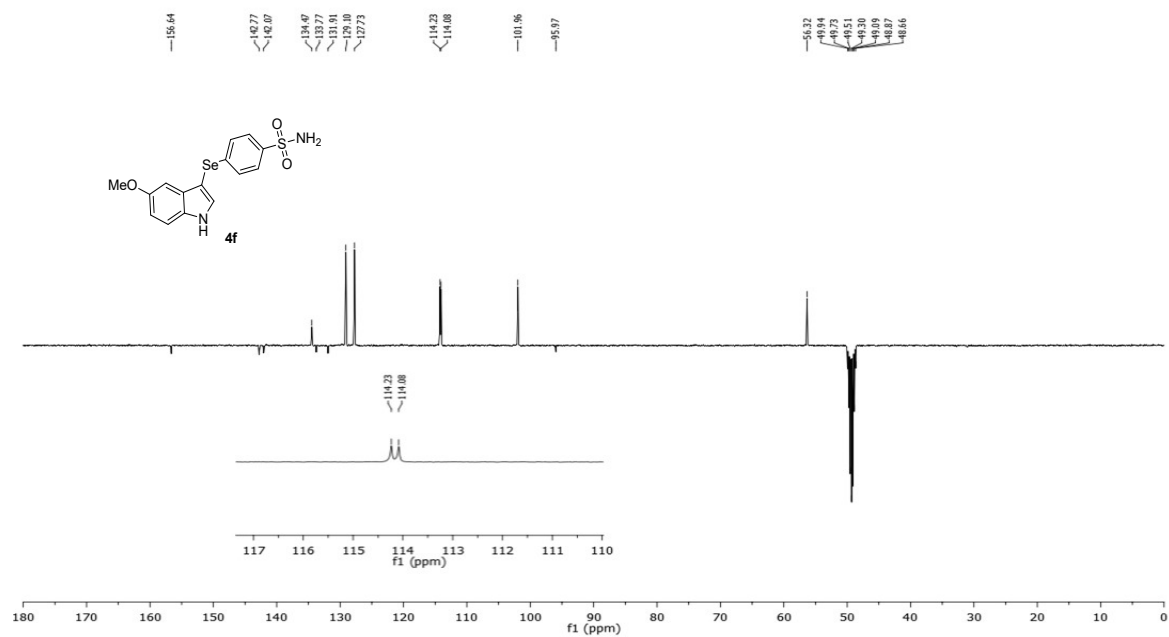

**Figure 48.** <sup>13</sup>C NMR spectrum of compound **4f** in CD<sub>3</sub>OD

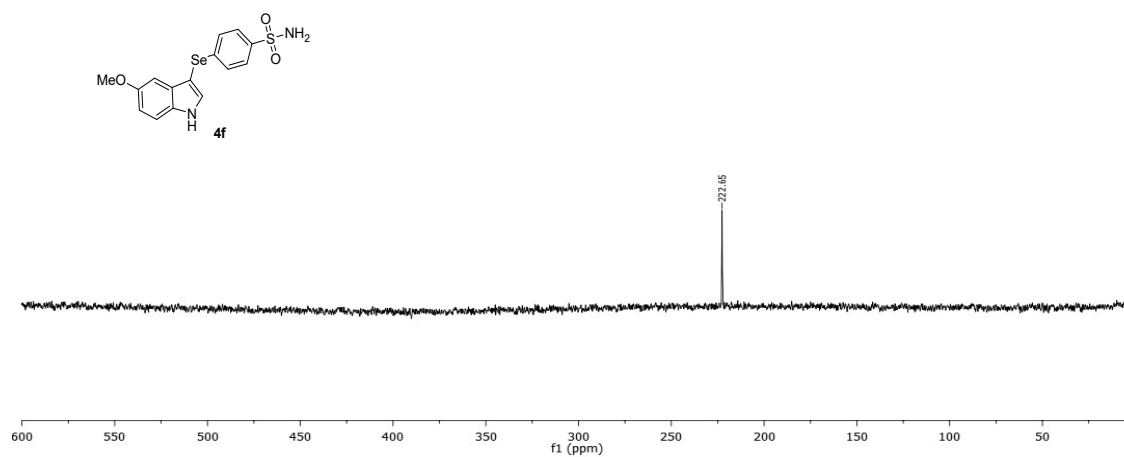

**Figure 49.** <sup>77</sup>Se NMR spectrum of compound **4f** in CD<sub>3</sub>OD

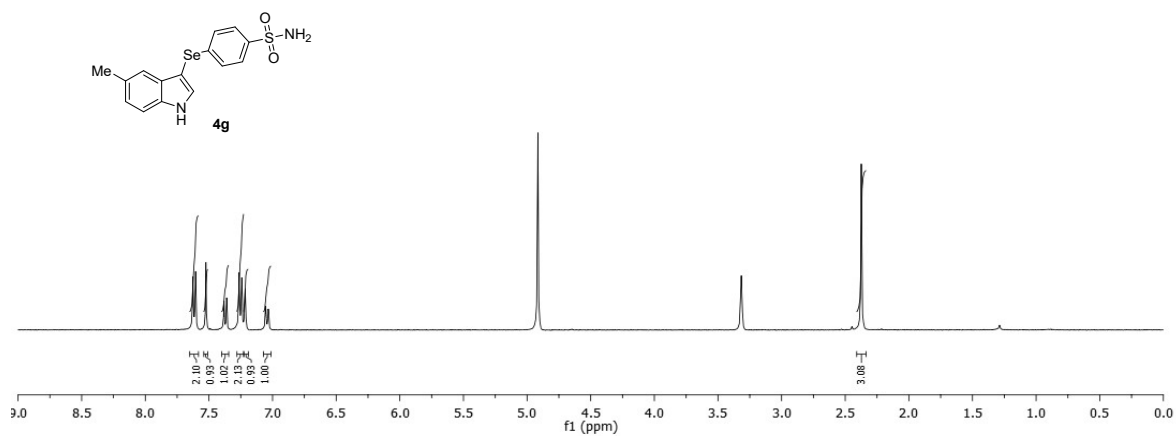

**Figure 50.** <sup>1</sup>H NMR spectrum of compound **4g** in CD<sub>3</sub>OD

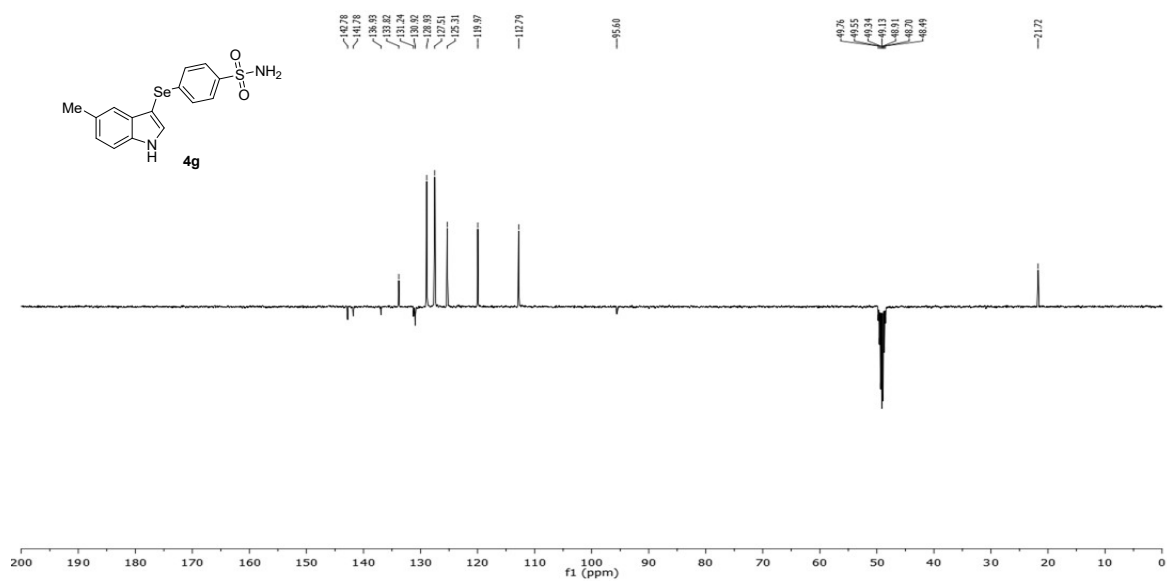

**Figure 51.** <sup>13</sup>C NMR spectrum of compound **4g** in CD<sub>3</sub>OD

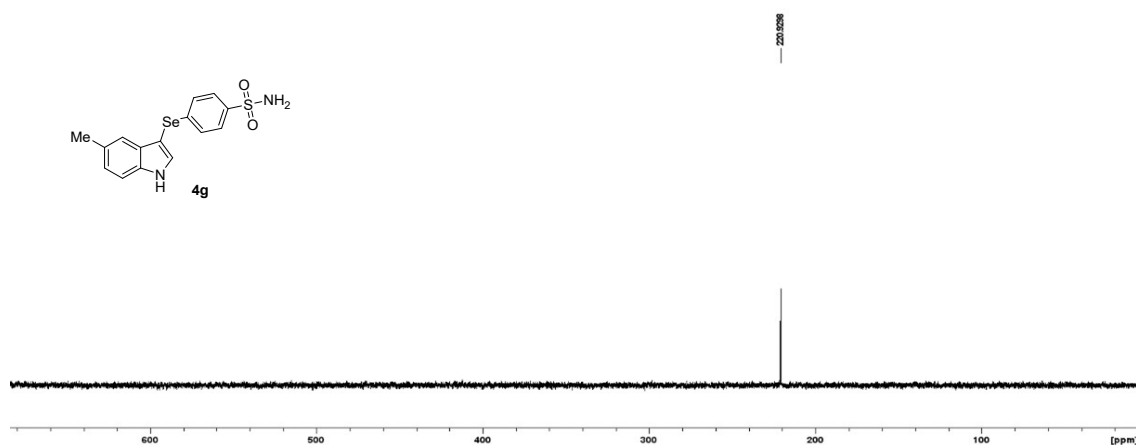

**Figure 52.** <sup>77</sup>Se NMR spectrum of compound **4g** in CD<sub>3</sub>OD

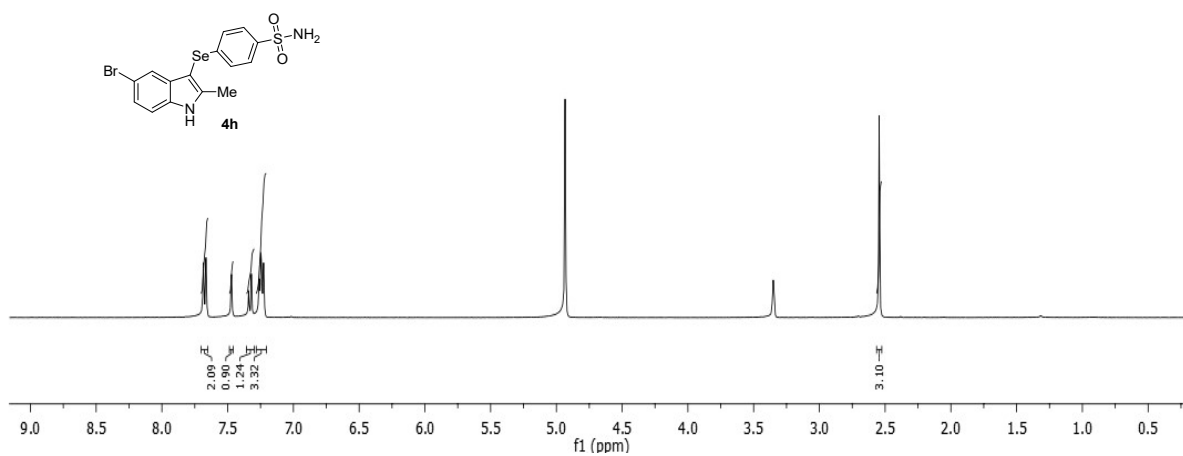

**Figure 53.** <sup>1</sup>H NMR spectrum of compound **4h** in CD<sub>3</sub>OD

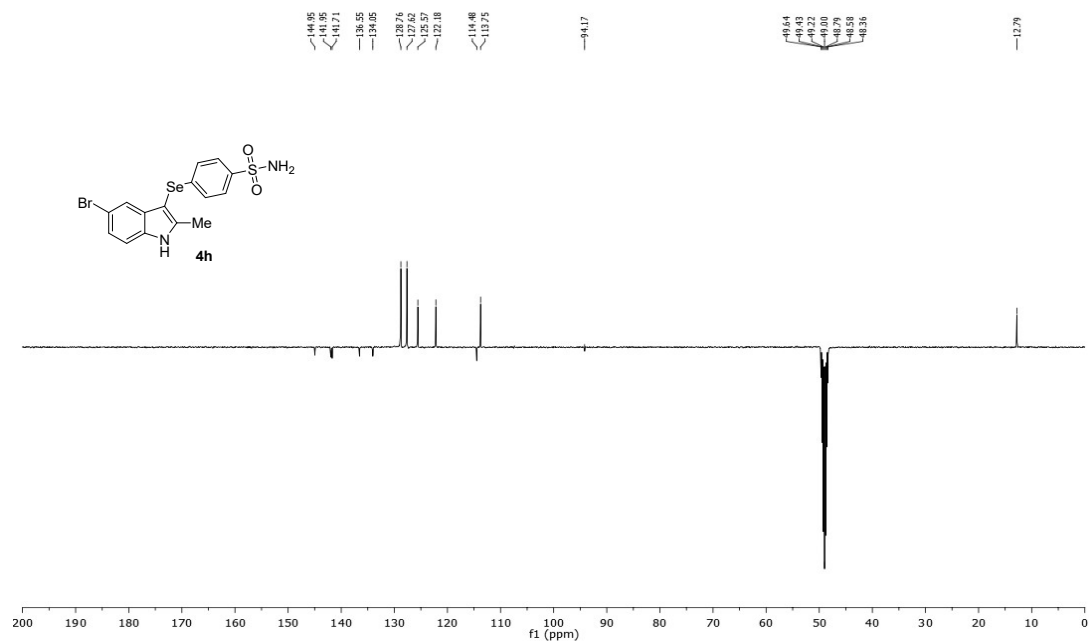

**Figure 54.** <sup>13</sup>C NMR spectrum of compound **4h** in CD<sub>3</sub>OD

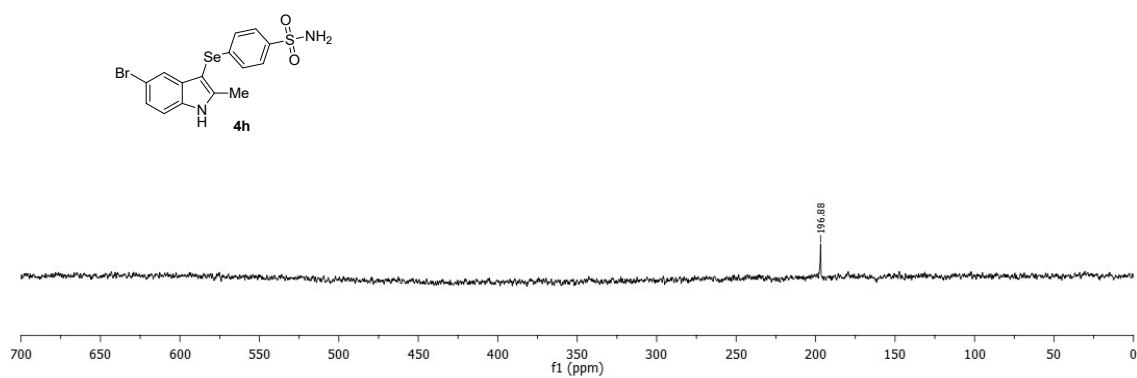

**Figure 55.** <sup>77</sup>Se NMR spectrum of compound **4h** in CD<sub>3</sub>OD

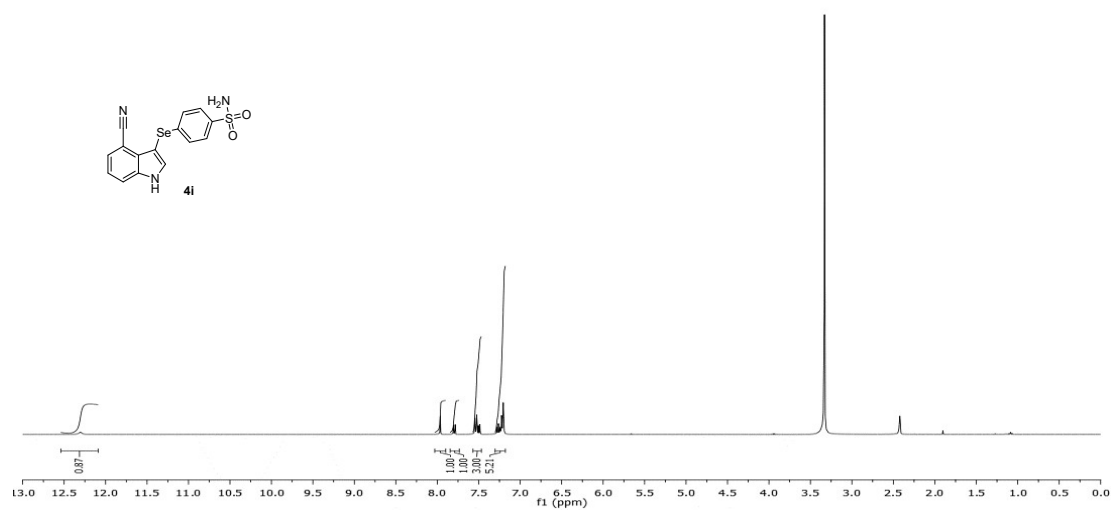

**Figure 56.** <sup>1</sup>H NMR spectrum of compound **4i** in DMSO-d<sub>6</sub>



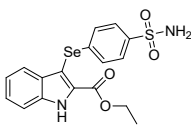

**4j**

Chemical structure of compound **4j** is shown above the  $^1\text{H}$  NMR spectrum. The structure is 2-(4-sulfamoylphenyl)-3-ethoxycarbonyl-1H-indole. The NMR spectrum displays a single sharp peak at  $\delta$  255.27 ppm, corresponding to the carbonyl carbon of the ethoxycarbonyl group.

**4k**

Nc1ccc(cc1)S(=O)(=O)c2ccc(cc2)Se3c(=O)[nH]c4ccccc34NCc5ccccc5

**4k**

S23

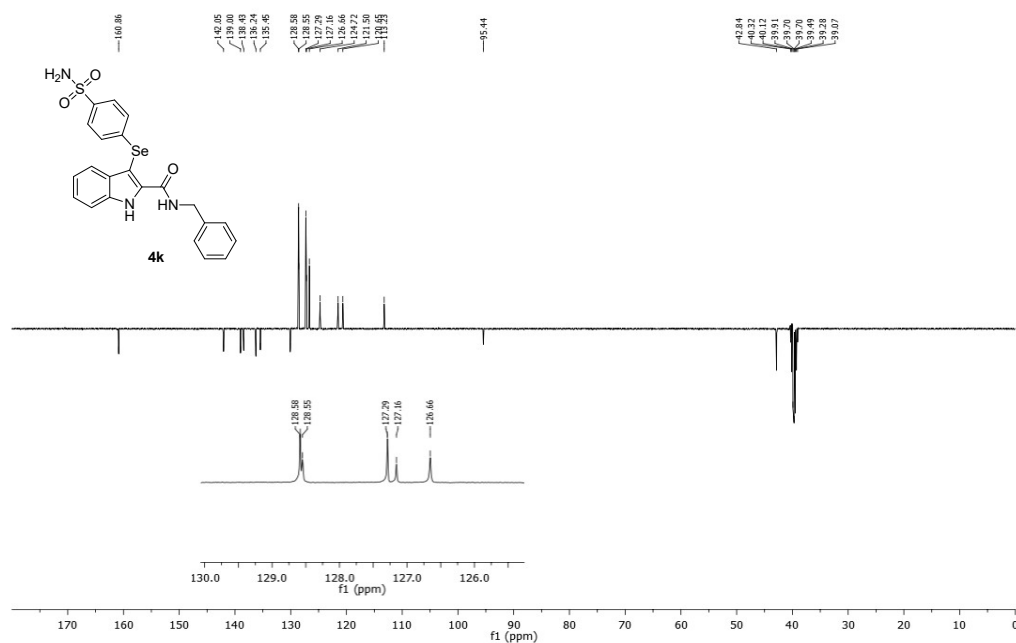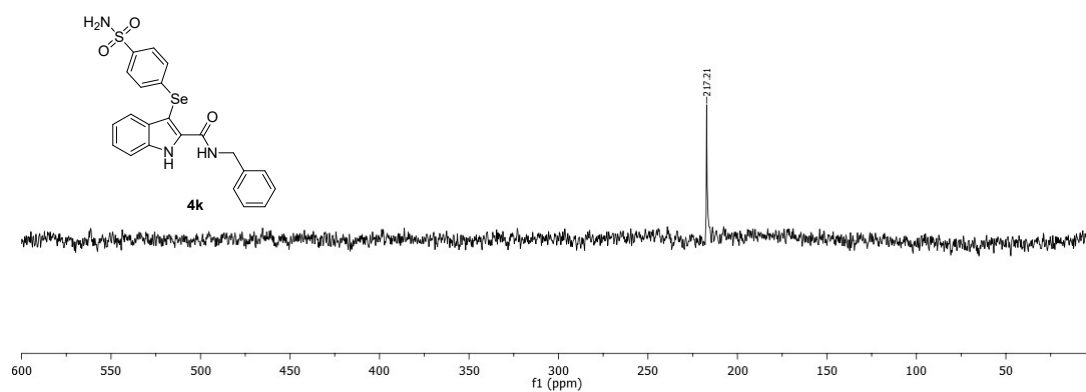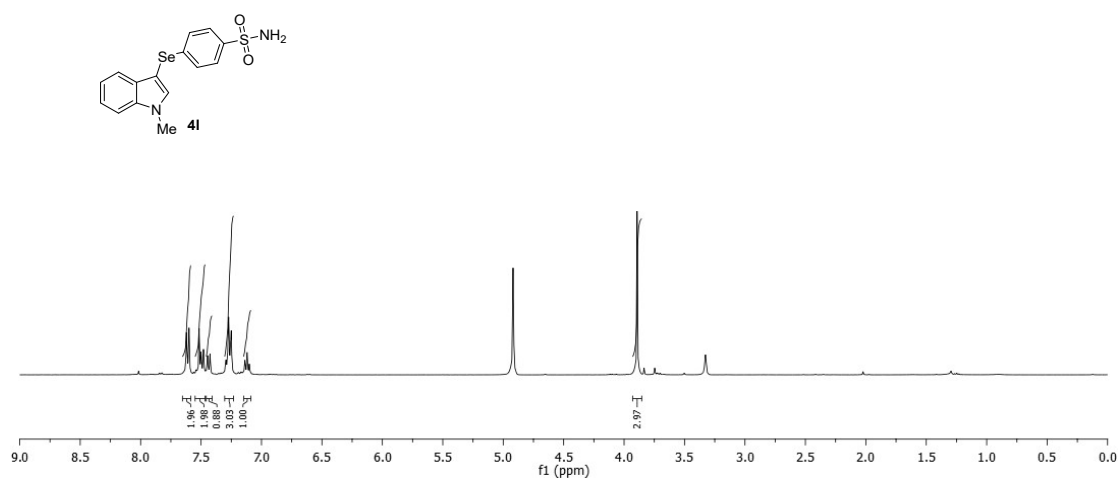



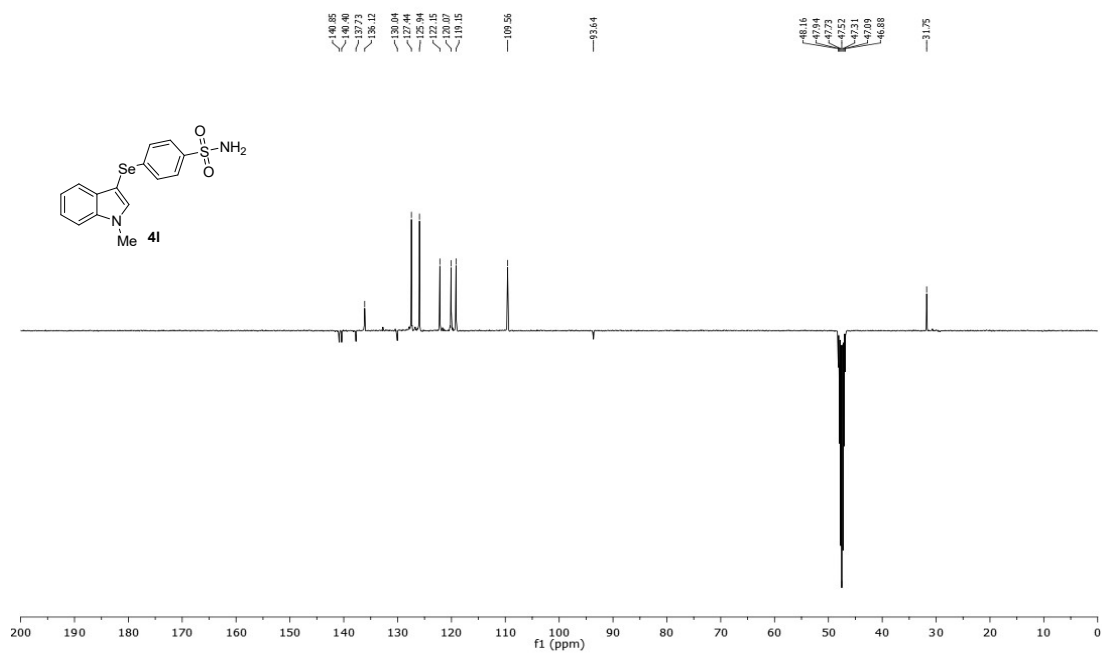

**Figure 66.** <sup>13</sup>C NMR spectrum of compound **4I** in CD<sub>3</sub>OD

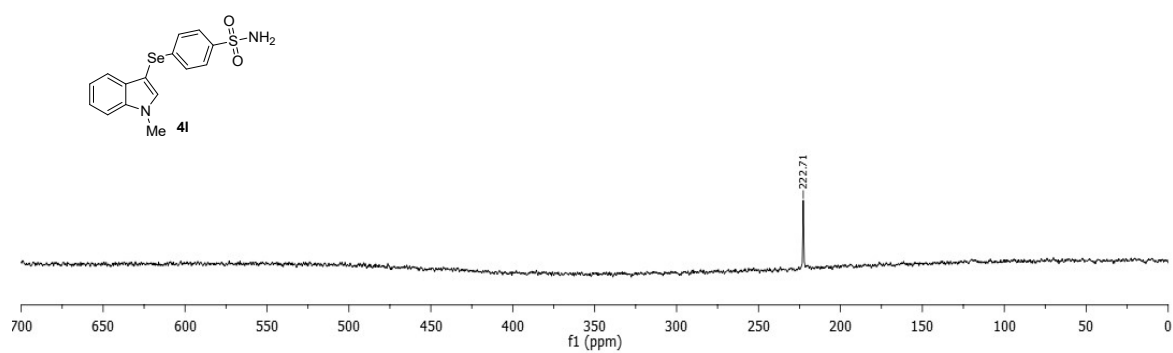

**Figure 67.** <sup>77</sup>Se NMR spectrum of compound **4I** in CD<sub>3</sub>OD

#### 4. HMRS Spectra of new compounds

##### Elemental Composition Report

##### Single Mass Analysis

Tolerance = 5.0 PPM / DBE: min = -1.5, max = 80.0

Element prediction: Off

Number of isotope peaks used for i-FIT = 9

Monoisotopic Mass, Even Electron Ions

75 formula(e) evaluated with 1 results within limits (all results (up to 1000) for each mass)

Elements Used:

C: 0-60 H: 0-60 N: 0-3 O: 0-3 Se: 1-1

210311\_AH\_40\_A 17 (0.197) Cm (14:21-(3:8+53:60))

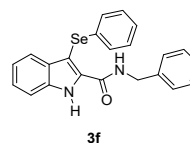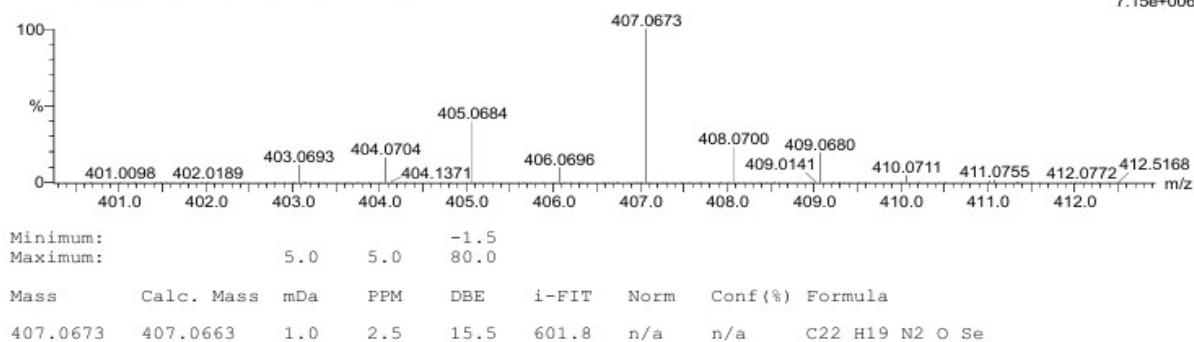

Figure 68. HRMS spectrum of compound 3f

##### Elemental Composition Report

##### Single Mass Analysis

Tolerance = 5.0 PPM / DBE: min = -1.5, max = 80.0

Element prediction: Off

Number of isotope peaks used for i-FIT = 9

Monoisotopic Mass, Even Electron Ions

72 formula(e) evaluated with 1 results within limits (all results (up to 1000) for each mass)

Elements Used:

C: 0-60 H: 0-60 N: 0-3 O: 0-3 Se: 1-1

210311\_AH\_25\_A 22 (0.240) Cm (22:37-2:9)

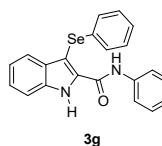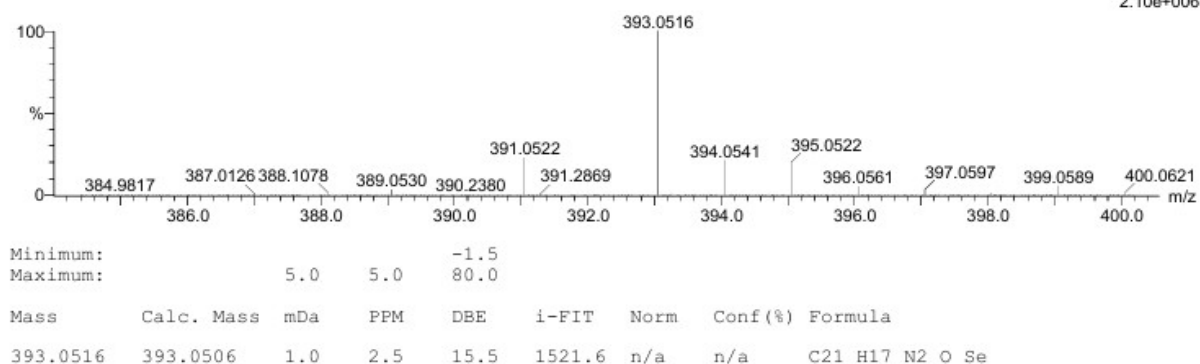

Figure 69. HRMS spectrum of compound 3g

Fi

## Elemental Composition Report

### Single Mass Analysis

Tolerance = 5.0 PPM / DBE: min = -1.5, max = 80.0

Element prediction: Off

Number of isotope peaks used for i-FIT = 9

Monoisotopic Mass, Even Electron Ions

16 formula(e) evaluated with 1 results within limits (all results (up to 1000) for each mass)

Elements Used:

C: 0-60 H: 0-60 N: 0-3 Se: 1-1

210311\_AH\_22A 16 (0.177) Cm (13:25-(3:8+52:60))

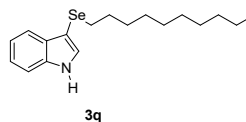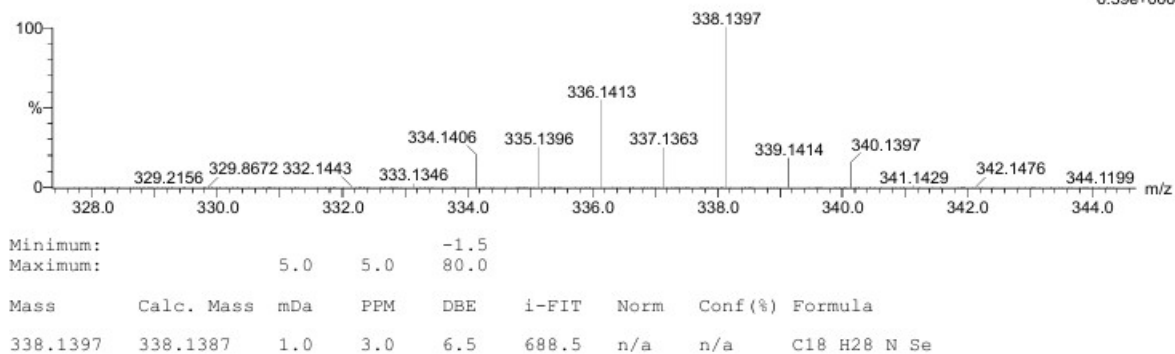

Figure 70. HRMS spectrum of compound 3q

## Elemental Composition Report

### Single Mass Analysis

Tolerance = 5.0 PPM / DBE: min = -1.5, max = 80.0

Element prediction: Off

Number of isotope peaks used for i-FIT = 9

Monoisotopic Mass, Even Electron Ions

22 formula(e) evaluated with 1 results within limits (all results (up to 1000) for each mass)

Elements Used:

C: 0-60 H: 0-60 N: 0-3 Cl: 0-1 Se: 1-1

210311\_AH\_52 27 (0.294) Cm (27:40-3:8)

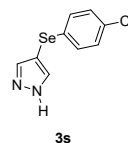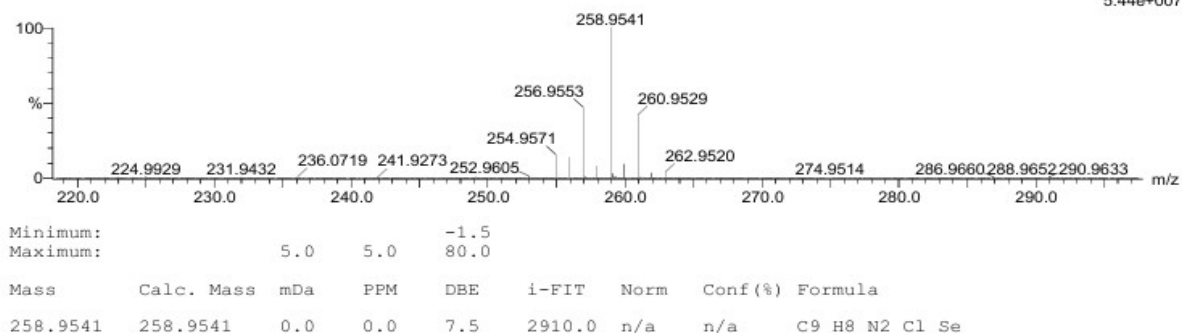

Figure 71. HRMS spectrum of compound 3s

## Elemental Composition Report

### Single Mass Analysis

Tolerance = 5.0 PPM / DBE: min = -1.5, max = 80.0

Element prediction: Off

Number of isotope peaks used for i-FIT = 9

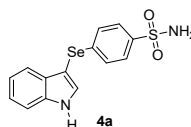

Monoisotopic Mass, Even Electron Ions

155 formula(e) evaluated with 2 results within limits (all results (up to 1000) for each mass)

Elements Used:

C: 0-60 H: 0-60 N: 0-2 O: 0-2 S: 0-1 Se: 0-1

210311\_AH\_02\_A 19 (0.214) Cm (19:32-(3:11+49:61))

TOF MS ES+  
6.46e+005

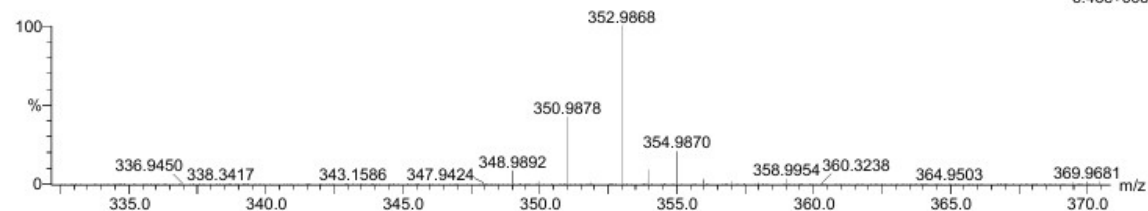

Minimum:  
Maximum:

| Mass     | Calc. Mass | mDa  | PPM  | DBE  | i-FIT | Norm  | Conf (%) | Formula            |
|----------|------------|------|------|------|-------|-------|----------|--------------------|
| 352.9868 | 352.9863   | 0.5  | 1.4  | 10.5 | 606.5 | 0.067 | 93.52    | C14 H13 N2 O2 S Se |
|          | 352.9869   | -0.1 | -0.3 | 19.5 | 609.2 | 2.736 | 6.48     | C22 H9 Se          |

**Figure 72.** HRMS spectrum of compound **4a**

## Elemental Composition Report

### Single Mass Analysis

Tolerance = 5.0 PPM / DBE: min = -1.5, max = 80.0

Element prediction: Off

Number of isotope peaks used for i-FIT = 9

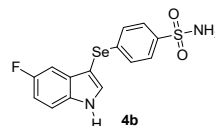

Monoisotopic Mass, Even Electron Ions

141 formula(e) evaluated with 3 results within limits (all results (up to 1000) for each mass)

Elements Used:

C: 0-60 H: 0-60 N: 0-2 O: 0-2 S: 0-1 Se: 1-1 F: 0-1

210311\_RG\_54\_A 19 (0.214) Cm (19:26-(4:8+38:45))

TOF MS ES+  
6.78e+005

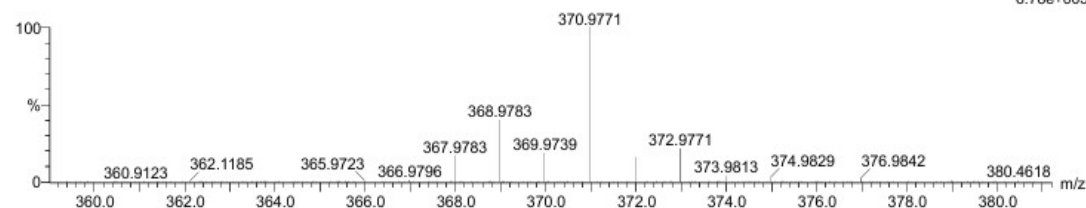

Minimum:  
Maximum:

| Mass     | Calc. Mass | mDa  | PPM  | DBE  | i-FIT | Norm  | Conf (%) | Formula              |
|----------|------------|------|------|------|-------|-------|----------|----------------------|
| 370.9771 | 370.9769   | 0.2  | 0.5  | 10.5 | 723.2 | 0.025 | 97.52    | C14 H12 N2 O2 S Se F |
|          | 370.9757   | 1.4  | 3.8  | 14.5 | 726.9 | 3.753 | 2.34     | C17 H11 N2 O S Se    |
|          | 370.9775   | -0.4 | -1.1 | 19.5 | 729.8 | 6.590 | 0.14     | C22 H8 Se F          |

**Figure 73.** HRMS spectrum of compound **4b**

## Elemental Composition Report

### Single Mass Analysis

Tolerance = 5.0 PPM / DBE: min = -1.5, max = 80.0

Element prediction: Off

Number of isotope peaks used for i-FIT = 9

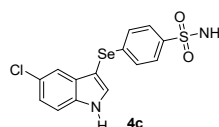

Monoisotopic Mass, Even Electron Ions

147 formula(e) evaluated with 3 results within limits (all results (up to 1000) for each mass)

Elements Used:

C: 0-60 H: 0-60 N: 0-2 O: 0-2 S: 0-1 Cl: 0-1 Se: 1-1

210311\_AH\_30\_A 17 (0.197) Cm (14:25-(3:8+57:60))

TOF MS ES+  
2.05e+006

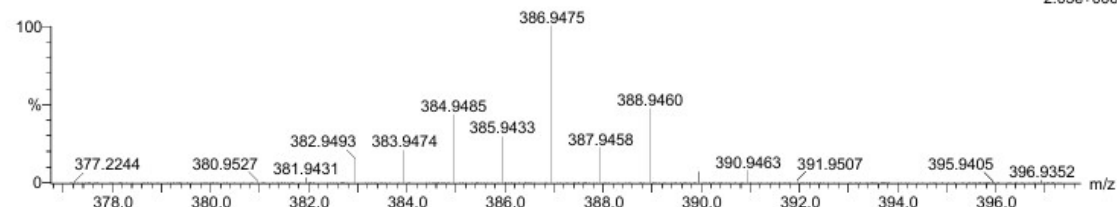

Minimum:

Maximum: 5.0 5.0 -1.5

| Mass     | Calc. Mass | mDa  | PPM  | DBE  | i-FIT  | Norm  | Conf (%) | Formula               |
|----------|------------|------|------|------|--------|-------|----------|-----------------------|
| 386.9475 | 386.9473   | 0.2  | 0.5  | 10.5 | 1257.0 | 3.007 | 4.94     | C14 H12 N2 O2 S Cl Se |
|          | 386.9480   | -0.5 | -1.3 | 19.5 | 1254.0 | 0.051 | 95.02    | C22 H8 Cl Se          |
|          | 386.9461   | 1.4  | 3.6  | 24.5 | 1261.8 | 7.805 | 0.04     | C23 H3 N2 Se          |

Figure 74. HRMS spectrum of compound 4c

## Elemental Composition Report

### Single Mass Analysis

Tolerance = 5.0 PPM / DBE: min = -1.5, max = 80.0

Element prediction: Off

Number of isotope peaks used for i-FIT = 9

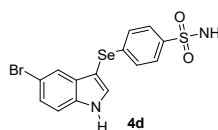

Monoisotopic Mass, Even Electron Ions

240 formula(e) evaluated with 2 results within limits (all results (up to 1000) for each mass)

Elements Used:

C: 0-60 H: 0-60 N: 0-2 O: 0-2 S: 0-1 Se: 1-1 Br: 0-3

210311\_AH\_03\_A 20 (0.223) Cm (20:25-(3:8+55:60))

TOF MS ES+  
6.92e+005

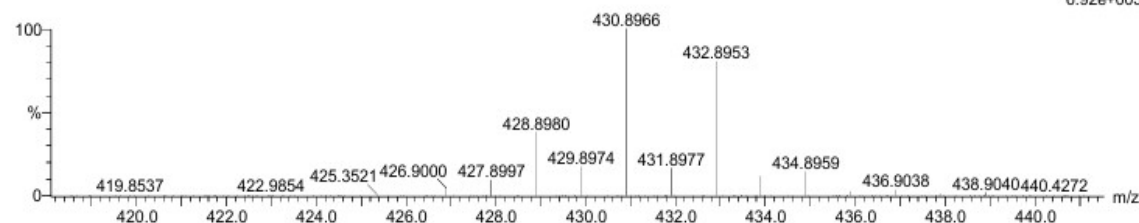

Minimum:

Maximum: 5.0 5.0 -1.5

| Mass     | Calc. Mass | mDa  | PPM  | DBE  | i-FIT | Norm  | Conf (%) | Formula               |
|----------|------------|------|------|------|-------|-------|----------|-----------------------|
| 430.8966 | 430.8968   | -0.2 | -0.5 | 10.5 | 606.3 | 0.000 | 99.99    | C14 H12 N2 O2 S Se Br |
|          | 430.8975   | -0.9 | -2.1 | 19.5 | 615.8 | 9.484 | 0.01     | C22 H8 Se Br          |

Figure 75. HRMS spectrum of compound 4d

## Elemental Composition Report

### Single Mass Analysis

Tolerance = 5.0 PPM / DBE: min = -1.5, max = 80.0

Element prediction: Off

Number of isotope peaks used for i-FIT = 9

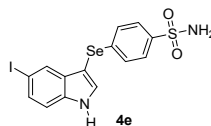

Monoisotopic Mass, Even Electron Ions

162 formula(e) evaluated with 2 results within limits (all results (up to 1000) for each mass)

Elements Used:

C: 0-60 H: 0-60 N: 0-2 O: 0-2 S: 0-1 Se: 1-1 I: 0-1

210311\_AH\_33\_A 25 (0.277) Cm (25:37-(1:8+57:60))

TOF MS ES+  
1.38e+006

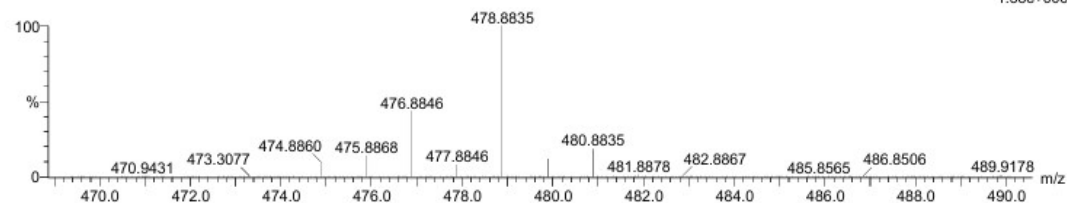

Minimum:  
Maximum:

| Mass     | Calc. Mass | mDa  | PPM  | DBE  | i-FIT  | Norm  | Conf (%) | Formula              |
|----------|------------|------|------|------|--------|-------|----------|----------------------|
| 478.8835 | 478.8829   | 0.6  | 1.3  | 10.5 | 1061.4 | 0.026 | 97.47    | C14 H12 N2 O2 S Se I |
|          | 478.8836   | -0.1 | -0.2 | 19.5 | 1065.0 | 3.678 | 2.53     | C22 H8 Se I          |

Figure 76. HRMS spectrum of compound 4e

## Elemental Composition Report

### Single Mass Analysis

Tolerance = 5.0 PPM / DBE: min = -1.5, max = 80.0

Element prediction: Off

Number of isotope peaks used for i-FIT = 9

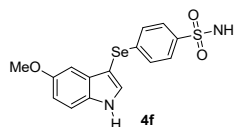

Monoisotopic Mass, Even Electron Ions

124 formula(e) evaluated with 2 results within limits (all results (up to 1000) for each mass)

Elements Used:

C: 0-60 H: 0-60 N: 0-2 O: 0-4 S: 0-1 Se: 1-1

210311\_AH\_12\_A 17 (0.197) Cm (14:24-(5:9+42:60))

TOF MS ES+  
2.26e+006

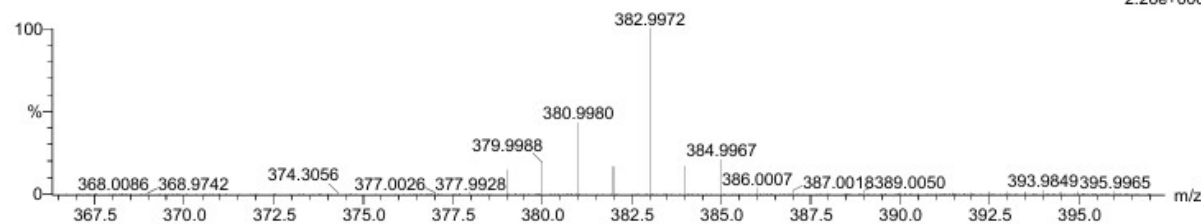

Minimum:  
Maximum:

| Mass     | Calc. Mass | mDa  | PPM  | DBE  | i-FIT | Norm  | Conf (%) | Formula            |
|----------|------------|------|------|------|-------|-------|----------|--------------------|
| 382.9972 | 382.9969   | 0.3  | 0.8  | 10.5 | 907.9 | 0.003 | 99.67    | C15 H15 N2 O3 S Se |
|          | 382.9975   | -0.3 | -0.8 | 19.5 | 913.6 | 5.709 | 0.33     | C23 H11 O Se       |

Figure 77. HRMS spectrum of compound 4f



## Elemental Composition Report

### Single Mass Analysis

Tolerance = 5.0 PPM / DBE: min = -1.5, max = 80.0

Element prediction: Off

Number of isotope peaks used for i-FIT = 9

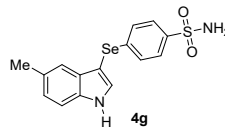

Monoisotopic Mass, Even Electron Ions

119 formula(e) evaluated with 2 results within limits (all results (up to 1000) for each mass)

Elements Used:

C: 0-60 H: 0-60 N: 0-2 O: 0-4 S: 0-1 Se: 1-1

210311\_RG\_71\_A 17 (0.197) Cm (16:26-(3:9+52:60))

TOF MS ES+  
3.91e+006

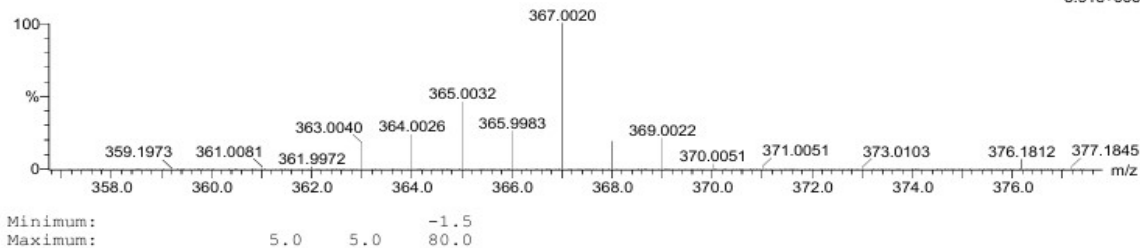

Figure 78. HRMS spectrum of compound 4g

## Elemental Composition Report

### Single Mass Analysis

Tolerance = 5.0 PPM / DBE: min = -1.5, max = 80.0

Element prediction: Off

Number of isotope peaks used for i-FIT = 9

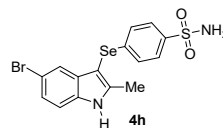

Monoisotopic Mass, Even Electron Ions

393 formula(e) evaluated with 3 results within limits (all results (up to 1000) for each mass)

Elements Used:

C: 0-60 H: 0-60 N: 0-2 O: 0-4 S: 0-1 Se: 1-1 Br: 0-3

210311\_RG\_60\_A 17 (0.197) Cm (15:27-(3:7+53:57))

TOF MS ES+  
1.28e+007

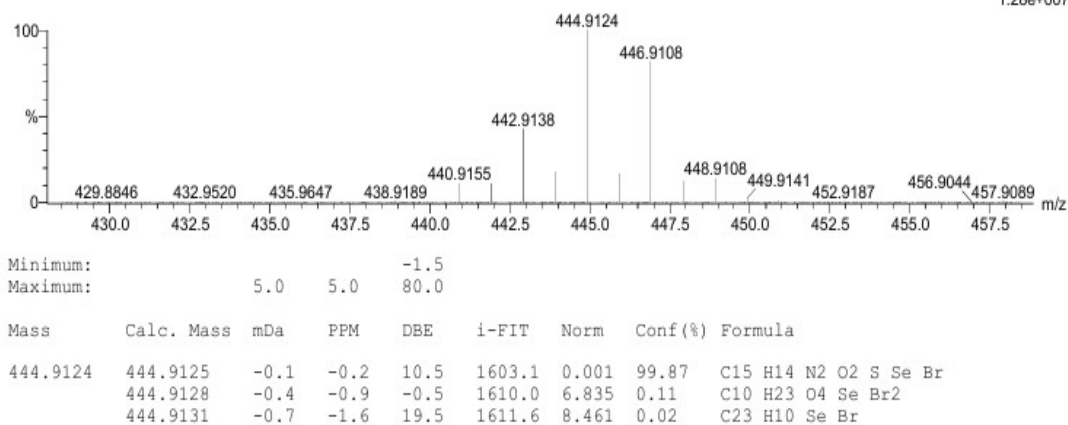

Figure 79. HRMS spectrum of compound 4h

## Elemental Composition Report

### Single Mass Analysis

Tolerance = 5.0 PPM / DBE: min = -1.5, max = 80.0

Element prediction: Off

Number of isotope peaks used for i-FIT = 9

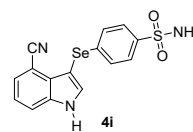

Monoisotopic Mass, Even Electron Ions

102 formula(e) evaluated with 2 results within limits (all results (up to 1000) for each mass)

Elements Used:

C: 0-60 H: 0-60 N: 0-3 O: 0-2 S: 0-1 Se: 1-1

210311\_AH\_36\_A 17 (0.197) Cm (15:26-4.8)

TOF MS ES+  
2.89e+006

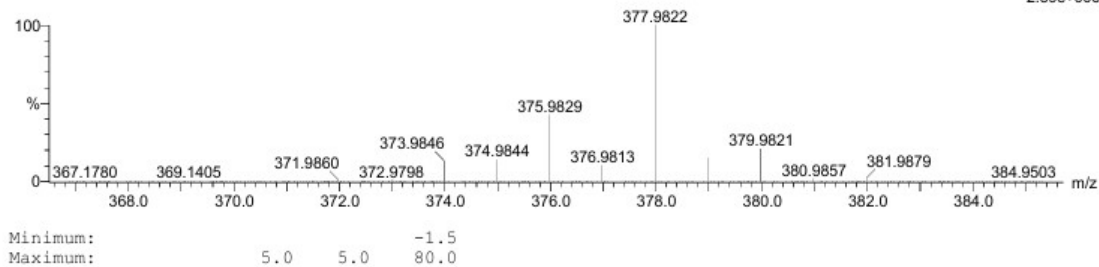

|          |            |     |     |      |        |       |         |                    |
|----------|------------|-----|-----|------|--------|-------|---------|--------------------|
| Minimum: |            |     |     | -1.5 |        |       |         |                    |
| Maximum: |            | 5.0 | 5.0 | 80.0 |        |       |         |                    |
| Mass     | Calc. Mass | mDa | PPM | DBE  | i-FIT  | Norm  | Conf(%) | Formula            |
| 377.9822 | 377.9815   | 0.7 | 1.9 | 12.5 | 1272.2 | 0.006 | 99.40   | C15 H12 N3 O2 S Se |
|          | 377.9822   | 0.0 | 0.0 | 21.5 | 1277.3 | 5.122 | 0.60    | C23 H8 N Se        |

**Figure 80.** HRMS spectrum of compound **4i**

## Elemental Composition Report

### Single Mass Analysis

Tolerance = 5.0 PPM / DBE: min = -1.5, max = 80.0

Element prediction: Off

Number of isotope peaks used for i-FIT = 9

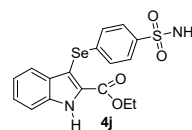

Monoisotopic Mass, Even Electron Ions

182 formula(e) evaluated with 2 results within limits (all results (up to 1000) for each mass)

Elements Used:

C: 0-60 H: 0-60 N: 0-3 O: 0-4 S: 0-1 Se: 1-1

210311\_RG\_58\_AA 12 (0.143)

TOF MS ES+  
1.53e+004

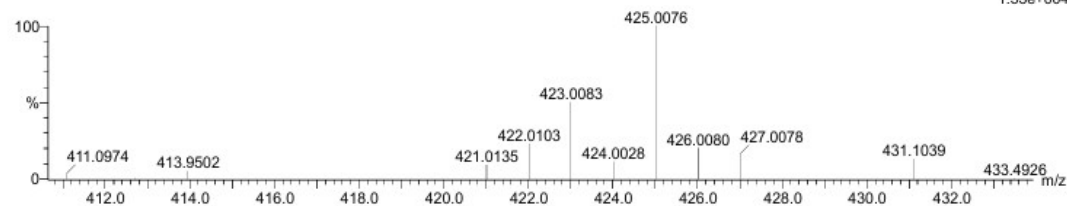

| Minimum: |            |      |      | -1.5 |       |       |          |                 |    |
|----------|------------|------|------|------|-------|-------|----------|-----------------|----|
| Maximum: |            | 5.0  | 5.0  | 80.0 |       |       |          |                 |    |
| Mass     | Calc. Mass | mDa  | PPM  | DBE  | i-FIT | Norm  | Conf (%) | Formula         |    |
| 425.0076 | 425.0074   | 0.2  | 0.5  | 11.5 | 42.1  | 0.769 | 46.33    | C17 H17 N2 O4 S | Se |
|          | 425.0081   | -0.5 | -1.2 | 20.5 | 41.9  | 0.622 | 53.67    | C25 H13 O2      | Se |

**Figure 81.** HRMS spectrum of compound **4j**



## Elemental Composition Report

### Single Mass Analysis

Tolerance = 5.0 PPM / DBE: min = -1.5, max = 80.0

Element prediction: Off

Number of isotope peaks used for i-FIT = 9

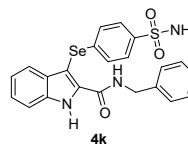

Monoisotopic Mass, Even Electron Ions

161 formula(e) evaluated with 2 results within limits (all results (up to 1000) for each mass)

Elements Used:

C: 0-60 H: 0-60 N: 0-3 O: 0-3 S: 0-1 Se: 1-1

210311\_AH\_46\_A 16 (0.177) Cm (15:21-(4:7+43:60))

TOF MS ES+  
8.68e+006

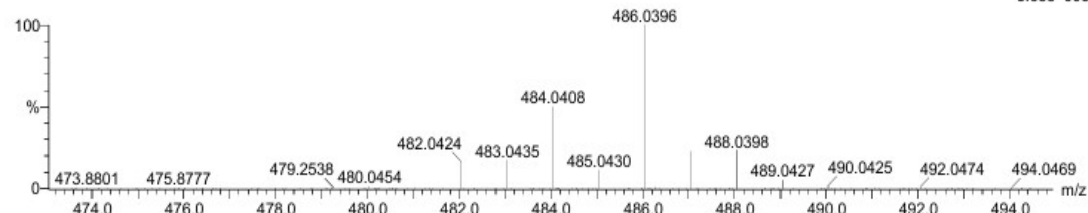

Minimum:  
Maximum:

5.0 5.0 -1.5  
80.0

| Mass     | Calc. Mass | mDa  | PPM  | DBE  | i-FIT | Norm  | Conf (%) | Formula            |
|----------|------------|------|------|------|-------|-------|----------|--------------------|
| 486.0396 | 486.0391   | 0.5  | 1.0  | 15.5 | 654.3 | 0.001 | 99.90    | C22 H20 N3 O3 S Se |
|          | 486.0397   | -0.1 | -0.2 | 24.5 | 661.2 | 6.927 | 0.10     | C30 H16 N O Se     |

Figure 82. HRMS spectrum of compound 4k

## Elemental Composition Report

### Single Mass Analysis

Tolerance = 5.0 PPM / DBE: min = -1.5, max = 80.0

Element prediction: Off

Number of isotope peaks used for i-FIT = 9

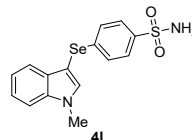

Monoisotopic Mass, Even Electron Ions

73 formula(e) evaluated with 2 results within limits (all results (up to 1000) for each mass)

Elements Used:

C: 0-60 H: 0-60 N: 0-2 O: 0-2 S: 0-1 Se: 1-1

210311\_AH\_35\_A 28 (0.303) Cm (28:43-(4:8+56:60))

TOF MS ES+  
2.47e+006

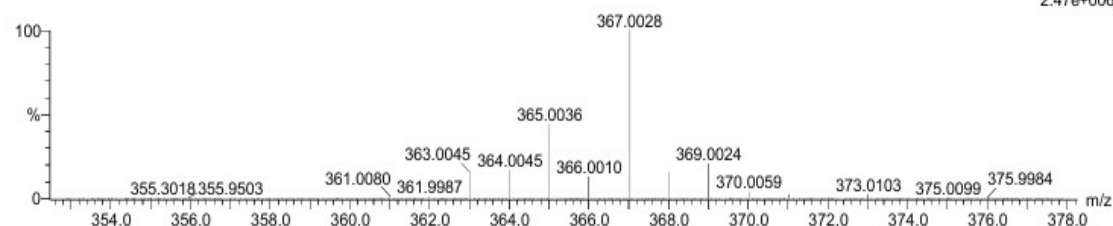

Minimum:  
Maximum:

5.0 5.0 -1.5  
80.0

| Mass     | Calc. Mass | mDa | PPM | DBE  | i-FIT  | Norm  | Conf (%) | Formula            |
|----------|------------|-----|-----|------|--------|-------|----------|--------------------|
| 367.0028 | 367.0019   | 0.9 | 2.5 | 10.5 | 1695.9 | 0.003 | 99.72    | C15 H15 N2 O2 S Se |
|          | 367.0026   | 0.2 | 0.5 | 19.5 | 1701.8 | 5.866 | 0.28     | C23 H11 Se         |

Figure 83. HRMS spectrum of compound 4l

## 5. Carbonic anhydrase inhibition

An Applied Photophysics stopped-flow instrument was used to assay the CA catalyzed CO<sub>2</sub> hydration activity.<sup>15</sup> Phenol red (at a concentration of 0.2 mM) was used as an indicator, working at the absorbance maximum of 557 nm, with 20 mM Hepes (pH 7.4) as a buffer, and 20 mM Na<sub>2</sub>SO<sub>4</sub> (to maintain constant ionic strength), following the initial rates of the CA-catalyzed CO<sub>2</sub> hydration reaction for a period of 10–100 s. The CO<sub>2</sub> concentrations ranged from 1.7 to 17 mM for the determination of the kinetic parameters and inhibition constants.<sup>16</sup> Enzyme concentrations ranged between 5–12 nM. For each inhibitor, at least six traces of the initial 5–10% of the reaction were used to determine the initial velocity. The uncatalyzed rates were determined in the same manner and subtracted from the total observed rates. Stock solutions of the inhibitor (0.1 mM) were prepared in distilled–deionized water and dilutions up to 0.01 nM were done thereafter with the assay buffer. Inhibitor and enzyme solutions were preincubated together for 15 min at room temperature prior to the assay, to allow for the formation of the E–I complex. The inhibition constants were obtained by non-linear least-squares methods using PRISM 3 and the Cheng-Prusoff equation as reported earlier and represent the mean from at least three different determinations. All CA isoforms were recombinant proteins obtained in house, as reported earlier.<sup>17–19</sup>

## 6. Human Carbonic Anhydrase activity

### Compound 4b

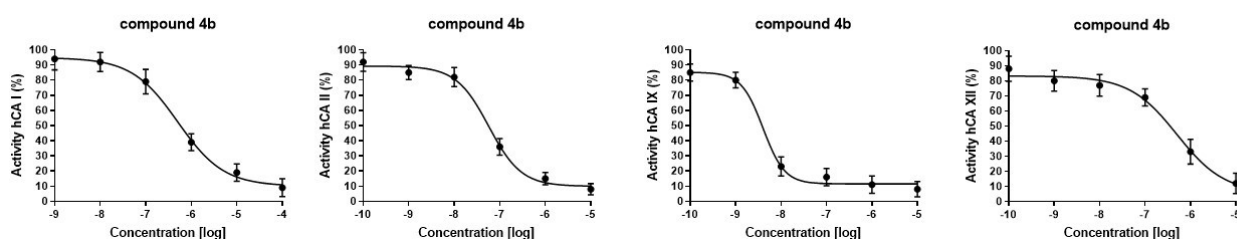

### Compound 4e

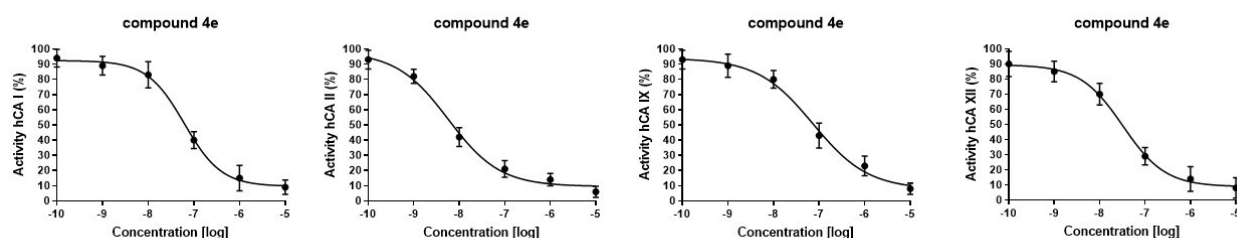

### Compound 4g

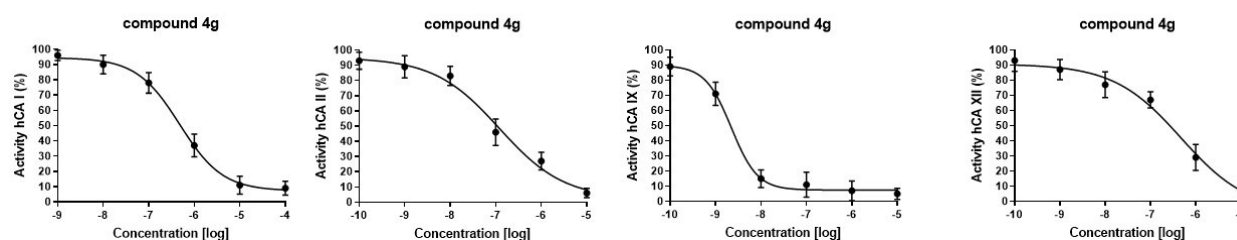

## Compound 4h

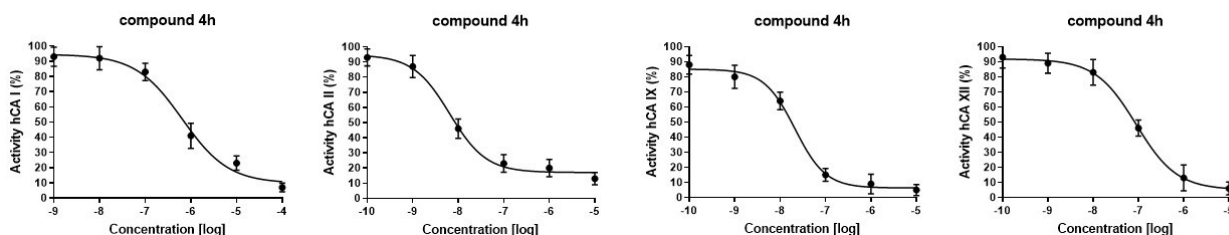

## Compound 4l

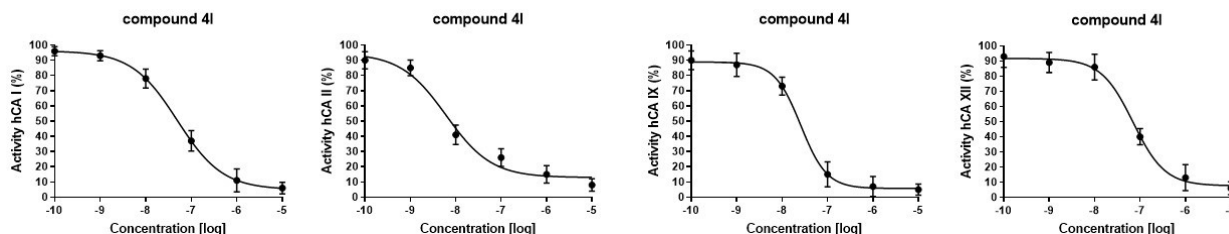

## 7. References

1. S. K. Sharma, A. K. Mandadapu, B. Kumar and B. Kundu, *J. Org. Chem.*, 2011, **76**, 6798.
2. L. Sancineto, A. Mariotti, L. Bagnoli, F. Marini, J. Desantis, N. Iraci, C. Santi, C. Pannecouque and O. Tabarrini, *J. Med. Chem.*, 2015, **58**, 9601.
3. A. Angeli, D. Tanini, A. Capperucci and C. T. Supuran, *ACS Med. Chem. Lett.*, 2017, **8**, 1213.
4. A. Krief and M. Derock, *Synlett*, 2005, **6**, 1012.
5. K. B. Sharpless and M. W. Young, *J. Org. Chem.*, 1975, **40**, 947.
6. D. Singh, A. M. Deobald, L. R. S. Camargo, G. Tabarelli, O. E. D. Rodrigues, and A. L. Braga, *Org. Lett.*, 2010, **12**, 3288.
7. Q. B. Zhang, Y. L. Ban, P. F. Yuan, S. J. Peng, J. G. Fang, L. Z. Wu and Q. Liu, *Green Chem.*, 2017, **19**, 5559.
8. R. H. Bartz, P. S. Hellwig, G. Perin, L. E. B. Iarocz, A. Madabeni, L. Orian and M. S. Silva, *New. J. Chem.*, 2024, **48**, 2971.
9. S. Saba, J. Rafique, M. S. Franco, A. R. Schneider, L. Espindola, D. O. Silva and A. L. Braga, *Org. Biomol. Chem.*, 2018, **16**, 880.
10. E. Q. Luz, D. Seckler, J. S. Araujo, L. Angst, D. B. Lima, E. A. M. Rios, R. R. Ribeiro and D. S. Rampon, *Tetrahedron*, 2019, **75**, 1258.
11. Y. Yu, Y. Zhou, Z. Song and G. Liang, *Org. Biomol. Chem.*, 2018, **16**, 4958.
12. A. L. Belladonna, R. Cervo, D. Alves, T. Barcellos, R. Cargnelutti and R. F. Schumacher, *Tetrahedron Lett.*, 2020, **61**, 152035.
13. J. B. Azeredo, M. Godoi, G. M. Martins, C. C. Silveira and A. L. Braga, *J. Org. Chem.*, 2014, **79**, 4125.
14. H. Zhang, X. Bao, Y. Song, J. Qu, B. Wang, *Tetrahedron*, 2015, **71**, 8885.
15. R. G. Khalifah, *J. Biol. Chem.*, 1971, **246**, 2561.
16. C. T. Supuran, *Nat. Rev. Drug Discov.*, 2008, **7**, 168.
17. A. Angeli, L. Micheli, R. Turnaturi, L. Pasquinucci, C. Parenti, V. Alterio, A. Di Fiore, G. De Simone, S. M. Monti, F. Carta, L. Di Cesare Mannelli, C. Ghelardini and C. T. Supuran, *Eur J Med Chem.*, 2023, **260**, 115783.
18. A. Angeli, E. Trallori, F. Carta, L. Di Cesare Mannelli, C. Ghelardini and C. T. Supuran, *ACS Med Chem Lett.*, 2018, **9**, 947.
19. D. Tanini, A. Capperucci, M. Ferraroni, F. Carta, A. Angeli, C. T. Supuran, *Eur J Med Chem.*, 2020, **185**, 111811.
